# Supplementary material for: Blood handling and leukocyte isolation methods impact the global transcriptome of immune cells
Source: BMC Immunol. 2018 Oct 30;19:30. doi: 10.1186/s12865-018-0268-6 (PMC6208098; doi:10.1186/s12865-018-0268-6)
Supplement: Supplementary file 3 — Table S4. ssGSEA results and significant comparisons. (XLSX 86 kb) [file 12865_2018_268_MOESM3_ESM.xlsx]

## Sheet: pval_FDR
Supplemental Table 4. ssGSEA results and significant comparisons.
Comparison	Gene Set	Ficoll versus Ficoll + 4C (P value)	Ficoll versus Ficoll + 20C (P value)	Ficoll versus Ficoll + 4C (FDR)	Ficoll versus Ficoll + 20C (FDR)
Monocytes (Ficoll versus 4C or RT)	PID_RXR_VDR_PATHWAY	0.00188304	0.310356	0.815363	0.818492
Monocytes (Ficoll versus 4C or RT)	KEGG_TYPE_II_DIABETES_MELLITUS	0.00314298	0.947302	0.815363	0.984766
Monocytes (Ficoll versus 4C or RT)	BIOCARTA_FIBRINOLYSIS_PATHWAY	0.00412015	0.214678	0.815363	0.818492
Monocytes (Ficoll versus 4C or RT)	PID_VEGF_VEGFR_PATHWAY	0.00737306	0.212616	0.815363	0.818492
Monocytes (Ficoll versus 4C or RT)	REACTOME_SYNTHESIS_OF_PIPS_AT_THE_LATE_ENDOSOME_MEMBRANE	0.00844388	0.419682	0.815363	0.818492
Monocytes (Ficoll versus 4C or RT)	PID_EPHA2_FWD_PATHWAY	0.00910663	0.76844	0.815363	0.930217
Monocytes (Ficoll versus 4C or RT)	REACTOME_TRANSPORT_TO_THE_GOLGI_AND_SUBSEQUENT_MODIFICATION	0.010975	0.0248757	0.815363	0.818492
Monocytes (Ficoll versus 4C or RT)	REACTOME_TRANSPORT_TO_THE_GOLGI_AND_SUBSEQUENT_MODIFICATION	0.010975	0.0248757	0.815363	0.818492
Monocytes (Ficoll versus 4C or RT)	BIOCARTA_TFF_PATHWAY	0.0117498	0.557449	0.815363	0.833601
Monocytes (Ficoll versus 4C or RT)	PID_AURORA_B_PATHWAY	0.01306	0.956486	0.815363	0.987206
Monocytes (Ficoll versus 4C or RT)	REACTOME_SYNTHESIS_OF_PIPS_AT_THE_EARLY_ENDOSOME_MEMBRANE	0.0134652	0.497296	0.815363	0.825141
Monocytes (Ficoll versus 4C or RT)	BIOCARTA_PLATELETAPP_PATHWAY	0.0206465	0.231568	0.815363	0.818492
Monocytes (Ficoll versus 4C or RT)	REACTOME_BASIGIN_INTERACTIONS	0.0226818	0.227288	0.815363	0.818492
Monocytes (Ficoll versus 4C or RT)	PID_CMYB_PATHWAY	0.0248923	0.492097	0.815363	0.825141
Monocytes (Ficoll versus 4C or RT)	REACTOME_TRAFFICKING_AND_PROCESSING_OF_ENDOSOMAL_TLR	0.030542	0.386684	0.815363	0.818492
Monocytes (Ficoll versus 4C or RT)	REACTOME_VEGF_LIGAND_RECEPTOR_INTERACTIONS	0.0322377	0.220211	0.815363	0.818492
Monocytes (Ficoll versus 4C or RT)	BIOCARTA_HSP27_PATHWAY	0.036401	0.198025	0.815363	0.818492
Monocytes (Ficoll versus 4C or RT)	PID_SYNDECAN_4_PATHWAY	0.0421322	0.225588	0.815363	0.818492
Monocytes (Ficoll versus 4C or RT)	REACTOME_TRAF6_MEDIATED_INDUCTION_OF_NFKB_AND_MAP_KINASES_UPON_TLR7_8_OR_9_ACTIVATION	0.0452106	0.860592	0.815363	0.96219
Monocytes (Ficoll versus 4C or RT)	KEGG_GAP_JUNCTION	0.0480033	0.672878	0.815363	0.88988
Monocytes (Ficoll versus 4C or RT)	PID_HIF1_TFPATHWAY	0.0480961	0.164671	0.815363	0.818492
Monocytes (Ficoll versus 4C or RT)	BIOCARTA_NO1_PATHWAY	0.048879	0.0876839	0.815363	0.818492
Monocytes (Ficoll versus 4C or RT)	KEGG_LINOLEIC_ACID_METABOLISM	0.0490698	0.283904	0.815363	0.818492
Monocytes (Ficoll versus 4C or RT)	REACTOME_ANTIGEN_PROCESSING_CROSS_PRESENTATION	0.141463	0.0218995	0.815363	0.818492
Monocytes (Ficoll versus 4C or RT)	REACTOME_TRANSCRIPTIONAL_ACTIVITY_OF_SMAD2_SMAD3_SMAD4_HETEROTRIMER	0.195055	0.00522515	0.815363	0.818492
Monocytes (Ficoll versus 4C or RT)	REACTOME_SMAD2_SMAD3_SMAD4_HETEROTRIMER_REGULATES_TRANSCRIPTION	0.223514	0.0330239	0.815363	0.818492
Monocytes (Ficoll versus 4C or RT)	REACTOME_MRNA_DECAY_BY_5_TO_3_EXORIBONUCLEASE	0.224977	0.0181809	0.815363	0.818492
Monocytes (Ficoll versus 4C or RT)	REACTOME_PASSIVE_TRANSPORT_BY_AQUAPORINS	0.228332	0.0276511	0.815363	0.818492
Monocytes (Ficoll versus 4C or RT)	REACTOME_CROSS_PRESENTATION_OF_SOLUBLE_EXOGENOUS_ANTIGENS_ENDOSOMES	0.327537	0.0357587	0.815363	0.818492
Monocytes (Ficoll versus 4C or RT)	PID_S1P_S1P1_PATHWAY	0.352466	0.0348056	0.815363	0.818492
Monocytes (Ficoll versus 4C or RT)	BIOCARTA_G1_PATHWAY	0.366723	0.0161491	0.815363	0.818492
Monocytes (Ficoll versus 4C or RT)	KEGG_MTOR_SIGNALING_PATHWAY	0.400309	0.0149534	0.815363	0.818492
Monocytes (Ficoll versus 4C or RT)	ST_ADRENERGIC	0.476031	0.0325086	0.817432	0.818492
Monocytes (Ficoll versus 4C or RT)	REACTOME_LYSOSOME_VESICLE_BIOGENESIS	0.501751	0.0473353	0.818606	0.818492
Monocytes (Ficoll versus 4C or RT)	REACTOME_TRANSPORT_OF_VITAMINS_NUCLEOSIDES_AND_RELATED_MOLECULES	0.539159	0.0469143	0.830665	0.818492
Monocytes (Ficoll versus 4C or RT)	KEGG_ARGININE_AND_PROLINE_METABOLISM	0.596409	0.0434881	0.853235	0.818492
Monocytes (Ficoll versus 4C or RT)	REACTOME_ALPHA_LINOLENIC_ACID_ALA_METABOLISM	0.643476	0.049776	0.878567	0.818492
Monocytes (Ficoll versus 4C or RT)	PID_RAC1_PATHWAY	0.649221	0.026931	0.878567	0.818492
Monocytes (Ficoll versus 4C or RT)	KEGG_PYRUVATE_METABOLISM	0.6691	0.0469721	0.884414	0.818492
Monocytes (Ficoll versus 4C or RT)	KEGG_ASCORBATE_AND_ALDARATE_METABOLISM	0.678608	0.0463299	0.884414	0.818492
Monocytes (Ficoll versus 4C or RT)	KEGG_BETA_ALANINE_METABOLISM	0.685121	0.028236	0.884414	0.818492
Monocytes (Ficoll versus 4C or RT)	PID_CDC42_REG_PATHWAY	0.696875	0.00627532	0.884414	0.818492
Monocytes (Ficoll versus 4C or RT)	REACTOME_PEROXISOMAL_LIPID_METABOLISM	0.733915	0.0344068	0.908052	0.818492
Monocytes (Ficoll versus 4C or RT)	KEGG_GLYCOSPHINGOLIPID_BIOSYNTHESIS_GANGLIO_SERIES	0.753649	0.000330654	0.916357	0.425883
Monocytes (Ficoll versus 4C or RT)	REACTOME_PYRUVATE_METABOLISM_AND_CITRIC_ACID_TCA_CYCLE	0.792132	0.0417529	0.926736	0.818492
Monocytes (Ficoll versus 4C or RT)	REACTOME_REGULATION_OF_APOPTOSIS	0.797552	0.0239734	0.926736	0.818492
Monocytes (Ficoll versus 4C or RT)	PID_ALPHA_SYNUCLEIN_PATHWAY	0.798746	0.0234937	0.926736	0.818492
Monocytes (Ficoll versus 4C or RT)	REACTOME_ACYL_CHAIN_REMODELLING_OF_PG	0.803795	0.0411529	0.92725	0.818492
Monocytes (Ficoll versus 4C or RT)	REACTOME_SCFSKP2_MEDIATED_DEGRADATION_OF_P27_P21	0.804163	0.0255537	0.92725	0.818492
Monocytes (Ficoll versus 4C or RT)	REACTOME_GLUCURONIDATION	0.826979	0.00743686	0.935983	0.818492
Monocytes (Ficoll versus 4C or RT)	KEGG_TGF_BETA_SIGNALING_PATHWAY	0.856302	0.0276571	0.949154	0.818492
Monocytes (Ficoll versus 4C or RT)	PID_THROMBIN_PAR4_PATHWAY	0.881696	0.0423807	0.95981	0.818492
Monocytes (Ficoll versus 4C or RT)	REACTOME_SIGNALING_BY_FGFR1_MUTANTS	0.900922	0.0305321	0.962178	0.818492
Monocytes (Ficoll versus 4C or RT)	REACTOME_SIGNALING_BY_FGFR_MUTANTS	0.912333	0.0315669	0.967945	0.818492
Monocytes (Ficoll versus 4C or RT)	REACTOME_ACTIVATION_OF_THE_AP1_FAMILY_OF_TRANSCRIPTION_FACTORS	0.958141	0.0130939	0.987137	0.818492
Monocytes (Ficoll versus 4C or RT)	REACTOME_CHEMOKINE_RECEPTORS_BIND_CHEMOKINES	0.980684	0.0106045	0.992239	0.818492
Comparison	Gene Set	Ficoll versus Ficoll + 4C (P value)	Ficoll versus Ficoll + 20C (P value)	Ficoll versus Ficoll + 4C (FDR)	Ficoll versus Ficoll + 20C (FDR)
CD8 T cells (Ficoll versus 4C or RT)	REACTOME_GLUCOSE_TRANSPORT	0.0419908	0.0583898	0.916605	0.462158
CD8 T cells (Ficoll versus 4C or RT)	REACTOME_DAG_AND_IP3_SIGNALING	0.0152223	0.222321	0.916605	0.571152
CD8 T cells (Ficoll versus 4C or RT)	KEGG_HEDGEHOG_SIGNALING_PATHWAY	0.0499734	0.402061	0.916605	0.647157
CD8 T cells (Ficoll versus 4C or RT)	BIOCARTA_CHREBP2_PATHWAY	0.0486159	0.458304	0.916605	0.671836
CD8 T cells (Ficoll versus 4C or RT)	REACTOME_COMMON_PATHWAY	0.040771	0.478478	0.916605	0.687258
CD8 T cells (Ficoll versus 4C or RT)	PID_HES_HEY_PATHWAY	0.0367496	0.519961	0.916605	0.718046
CD8 T cells (Ficoll versus 4C or RT)	REACTOME_FORMATION_OF_TUBULIN_FOLDING_INTERMEDIATES_BY_CCT_TRIC	0.0258194	0.877266	0.916605	0.93883
CD8 T cells (Ficoll versus 4C or RT)	REACTOME_EICOSANOID_LIGAND_BINDING_RECEPTORS	0.404452	0.000887548	0.916605	0.314315
CD8 T cells (Ficoll versus 4C or RT)	REACTOME_CIRCADIAN_CLOCK	0.683933	0.000941633	0.917782	0.314315
CD8 T cells (Ficoll versus 4C or RT)	REACTOME_DEADENYLATION_OF_MRNA	0.779336	0.000993784	0.942155	0.314315
CD8 T cells (Ficoll versus 4C or RT)	REACTOME_PROLACTIN_RECEPTOR_SIGNALING	0.804901	0.00169492	0.954043	0.314315
CD8 T cells (Ficoll versus 4C or RT)	REACTOME_CELL_JUNCTION_ORGANIZATION	0.710871	0.00219858	0.92376	0.314315
CD8 T cells (Ficoll versus 4C or RT)	KEGG_VALINE_LEUCINE_AND_ISOLEUCINE_DEGRADATION	0.534857	0.0028276	0.916605	0.314315
CD8 T cells (Ficoll versus 4C or RT)	REACTOME_G_PROTEIN_BETA_GAMMA_SIGNALLING	0.350247	0.00305602	0.916605	0.314315
CD8 T cells (Ficoll versus 4C or RT)	BIOCARTA_TALL1_PATHWAY	0.871593	0.00311083	0.968155	0.314315
CD8 T cells (Ficoll versus 4C or RT)	PID_P53_REGULATION_PATHWAY	0.462294	0.00316954	0.916605	0.314315
CD8 T cells (Ficoll versus 4C or RT)	KEGG_PEROXISOME	0.0718945	0.0033016	0.916605	0.314315
CD8 T cells (Ficoll versus 4C or RT)	KEGG_PROPANOATE_METABOLISM	0.317706	0.00358021	0.916605	0.314315
CD8 T cells (Ficoll versus 4C or RT)	PID_SMAD2_3NUCLEAR_PATHWAY	0.335764	0.00385825	0.916605	0.314315
CD8 T cells (Ficoll versus 4C or RT)	REACTOME_DCC_MEDIATED_ATTRACTIVE_SIGNALING	0.486601	0.0041318	0.916605	0.314315
CD8 T cells (Ficoll versus 4C or RT)	KEGG_PATHWAYS_IN_CANCER	0.370037	0.00428961	0.916605	0.314315
CD8 T cells (Ficoll versus 4C or RT)	BIOCARTA_BLYMPHOCYTE_PATHWAY	0.250425	0.0044376	0.916605	0.314315
CD8 T cells (Ficoll versus 4C or RT)	REACTOME_CELL_EXTRACELLULAR_MATRIX_INTERACTIONS	0.587928	0.00489594	0.916605	0.314315
CD8 T cells (Ficoll versus 4C or RT)	REACTOME_REGULATION_OF_GLUCOKINASE_BY_GLUCOKINASE_REGULATORY_PROTEIN	0.121319	0.00491685	0.916605	0.314315
CD8 T cells (Ficoll versus 4C or RT)	REACTOME_SIGNALING_BY_RHO_GTPASES	0.270696	0.00510609	0.916605	0.314315
CD8 T cells (Ficoll versus 4C or RT)	ST_GAQ_PATHWAY	0.439819	0.00530541	0.916605	0.314315
CD8 T cells (Ficoll versus 4C or RT)	REACTOME_ELONGATION_ARREST_AND_RECOVERY	0.577615	0.00568559	0.916605	0.314315
CD8 T cells (Ficoll versus 4C or RT)	BIOCARTA_ERYTH_PATHWAY	0.429189	0.00580082	0.916605	0.314315
CD8 T cells (Ficoll versus 4C or RT)	REACTOME_SIGNAL_REGULATORY_PROTEIN_SIRP_FAMILY_INTERACTIONS	0.58097	0.00582534	0.916605	0.314315
CD8 T cells (Ficoll versus 4C or RT)	REACTOME_DEADENYLATION_DEPENDENT_MRNA_DECAY	0.247338	0.0062065	0.916605	0.316187
CD8 T cells (Ficoll versus 4C or RT)	KEGG_PENTOSE_AND_GLUCURONATE_INTERCONVERSIONS	0.860325	0.0063696	0.967964	0.316187
CD8 T cells (Ficoll versus 4C or RT)	REACTOME_HS_GAG_BIOSYNTHESIS	0.0875417	0.00709294	0.916605	0.338551
CD8 T cells (Ficoll versus 4C or RT)	PID_INTEGRIN2_PATHWAY	0.410508	0.00771223	0.916605	0.348055
CD8 T cells (Ficoll versus 4C or RT)	PID_TCPTP_PATHWAY	0.465439	0.00806949	0.916605	0.348055
CD8 T cells (Ficoll versus 4C or RT)	BIOCARTA_TGFB_PATHWAY	0.15825	0.00864254	0.916605	0.348055
CD8 T cells (Ficoll versus 4C or RT)	PID_AR_NONGENOMIC_PATHWAY	0.451963	0.0089084	0.916605	0.348055
CD8 T cells (Ficoll versus 4C or RT)	ST_JNK_MAPK_PATHWAY	0.251675	0.0090377	0.916605	0.348055
CD8 T cells (Ficoll versus 4C or RT)	REACTOME_DOWNREGULATION_OF_SMAD2_3_SMAD4_TRANSCRIPTIONAL_ACTIVITY	0.0664999	0.00911662	0.916605	0.348055
CD8 T cells (Ficoll versus 4C or RT)	KEGG_PENTOSE_PHOSPHATE_PATHWAY	0.498995	0.0092553	0.916605	0.348055
CD8 T cells (Ficoll versus 4C or RT)	ST_GA13_PATHWAY	0.94475	0.00989218	0.980029	0.361065
CD8 T cells (Ficoll versus 4C or RT)	PID_ANGIOPOIETIN_RECEPTOR_PATHWAY	0.0798347	0.0103833	0.916605	0.363157
CD8 T cells (Ficoll versus 4C or RT)	KEGG_NICOTINATE_AND_NICOTINAMIDE_METABOLISM	0.226975	0.0106189	0.916605	0.363157
CD8 T cells (Ficoll versus 4C or RT)	REACTOME_MRNA_DECAY_BY_3_TO_5_EXORIBONUCLEASE	0.0654046	0.0108594	0.916605	0.363157
CD8 T cells (Ficoll versus 4C or RT)	REACTOME_G_ALPHA_Z_SIGNALLING_EVENTS	0.642698	0.01112	0.916605	0.363157
CD8 T cells (Ficoll versus 4C or RT)	KEGG_FATTY_ACID_METABOLISM	0.892224	0.0133327	0.972677	0.421468
CD8 T cells (Ficoll versus 4C or RT)	BIOCARTA_RHO_PATHWAY	0.455992	0.0138606	0.916605	0.421468
CD8 T cells (Ficoll versus 4C or RT)	PID_P73PATHWAY	0.421091	0.0140776	0.916605	0.421468
CD8 T cells (Ficoll versus 4C or RT)	PID_TXA2PATHWAY	0.265104	0.014264	0.916605	0.421468
CD8 T cells (Ficoll versus 4C or RT)	REACTOME_CELL_CELL_COMMUNICATION	0.475758	0.0151128	0.916605	0.422725
CD8 T cells (Ficoll versus 4C or RT)	KEGG_VASOPRESSIN_REGULATED_WATER_REABSORPTION	0.90154	0.0153189	0.972677	0.422725
CD8 T cells (Ficoll versus 4C or RT)	BIOCARTA_BAD_PATHWAY	0.409843	0.0155523	0.916605	0.422725
CD8 T cells (Ficoll versus 4C or RT)	REACTOME_METABOLISM_OF_VITAMINS_AND_COFACTORS	0.970596	0.015768	0.994258	0.422725
CD8 T cells (Ficoll versus 4C or RT)	REACTOME_NRAGE_SIGNALS_DEATH_THROUGH_JNK	0.676349	0.0164531	0.916605	0.422725
CD8 T cells (Ficoll versus 4C or RT)	REACTOME_EGFR_DOWNREGULATION	0.539713	0.0169177	0.916605	0.422725
CD8 T cells (Ficoll versus 4C or RT)	REACTOME_INTERACTIONS_OF_VPR_WITH_HOST_CELLULAR_PROTEINS	0.0979665	0.0174994	0.916605	0.422725
CD8 T cells (Ficoll versus 4C or RT)	PID_HIF1_TFPATHWAY	0.288051	0.0180836	0.916605	0.422725
CD8 T cells (Ficoll versus 4C or RT)	REACTOME_MTORC1_MEDIATED_SIGNALLING	0.993566	0.0181987	0.995097	0.422725
CD8 T cells (Ficoll versus 4C or RT)	BIOCARTA_ETS_PATHWAY	0.604803	0.0183086	0.916605	0.422725
CD8 T cells (Ficoll versus 4C or RT)	REACTOME_G_BETA_GAMMA_SIGNALLING_THROUGH_PLC_BETA	0.386225	0.0188317	0.916605	0.422725
CD8 T cells (Ficoll versus 4C or RT)	REACTOME_GLUCONEOGENESIS	0.651921	0.0190503	0.916605	0.422725
CD8 T cells (Ficoll versus 4C or RT)	BIOCARTA_NGF_PATHWAY	0.302059	0.0197661	0.916605	0.422725
CD8 T cells (Ficoll versus 4C or RT)	KEGG_CIRCADIAN_RHYTHM_MAMMAL	0.966422	0.0198027	0.994258	0.422725
CD8 T cells (Ficoll versus 4C or RT)	REACTOME_TRANSPORT_OF_RIBONUCLEOPROTEINS_INTO_THE_HOST_NUCLEUS	0.162821	0.0206558	0.916605	0.422725
CD8 T cells (Ficoll versus 4C or RT)	REACTOME_BRANCHED_CHAIN_AMINO_ACID_CATABOLISM	0.470712	0.0208238	0.916605	0.422725
CD8 T cells (Ficoll versus 4C or RT)	REACTOME_CYCLIN_E_ASSOCIATED_EVENTS_DURING_G1_S_TRANSITION_	0.0511937	0.0211722	0.916605	0.422725
CD8 T cells (Ficoll versus 4C or RT)	BIOCARTA_ERK_PATHWAY	0.241282	0.0214787	0.916605	0.422725
CD8 T cells (Ficoll versus 4C or RT)	KEGG_RIBOFLAVIN_METABOLISM	0.194135	0.0221005	0.916605	0.422725
CD8 T cells (Ficoll versus 4C or RT)	REACTOME_BMAL1_CLOCK_NPAS2_ACTIVATES_CIRCADIAN_EXPRESSION	0.621463	0.022311	0.916605	0.422725
CD8 T cells (Ficoll versus 4C or RT)	PID_DNA_PK_PATHWAY	0.444843	0.0224558	0.916605	0.422725
CD8 T cells (Ficoll versus 4C or RT)	REACTOME_RORA_ACTIVATES_CIRCADIAN_EXPRESSION	0.387709	0.0235329	0.916605	0.422725
CD8 T cells (Ficoll versus 4C or RT)	REACTOME_ZINC_TRANSPORTERS	0.567299	0.0240124	0.916605	0.422725
CD8 T cells (Ficoll versus 4C or RT)	BIOCARTA_CARDIACEGF_PATHWAY	0.230348	0.024051	0.916605	0.422725
CD8 T cells (Ficoll versus 4C or RT)	BIOCARTA_MPR_PATHWAY	0.612287	0.0242604	0.916605	0.422725
CD8 T cells (Ficoll versus 4C or RT)	KEGG_ALANINE_ASPARTATE_AND_GLUTAMATE_METABOLISM	0.646121	0.0243329	0.916605	0.422725
CD8 T cells (Ficoll versus 4C or RT)	REACTOME_INSULIN_RECEPTOR_SIGNALLING_CASCADE	0.45984	0.0258109	0.916605	0.422725
CD8 T cells (Ficoll versus 4C or RT)	REACTOME_THROMBIN_SIGNALLING_THROUGH_PROTEINASE_ACTIVATED_RECEPTORS_PARS	0.237111	0.0260949	0.916605	0.422725
CD8 T cells (Ficoll versus 4C or RT)	KEGG_HOMOLOGOUS_RECOMBINATION	0.884649	0.02616	0.970407	0.422725
CD8 T cells (Ficoll versus 4C or RT)	REACTOME_INHIBITION_OF_INSULIN_SECRETION_BY_ADRENALINE_NORADRENALINE	0.552194	0.0262712	0.916605	0.422725
CD8 T cells (Ficoll versus 4C or RT)	REACTOME_CIRCADIAN_REPRESSION_OF_EXPRESSION_BY_REV_ERBA	0.389984	0.0263475	0.916605	0.422725
CD8 T cells (Ficoll versus 4C or RT)	BIOCARTA_UCALPAIN_PATHWAY	0.573339	0.0263881	0.916605	0.422725
CD8 T cells (Ficoll versus 4C or RT)	REACTOME_SIGNALING_BY_NODAL	0.107783	0.0270048	0.916605	0.422725
CD8 T cells (Ficoll versus 4C or RT)	REACTOME_PLATELET_HOMEOSTASIS	0.219919	0.0271348	0.916605	0.422725
CD8 T cells (Ficoll versus 4C or RT)	PID_VEGFR1_PATHWAY	0.107411	0.0272083	0.916605	0.422725
CD8 T cells (Ficoll versus 4C or RT)	REACTOME_ANTIGEN_ACTIVATES_B_CELL_RECEPTOR_LEADING_TO_GENERATION_OF_SECOND_MESSENGERS	0.325691	0.0275874	0.916605	0.422725
CD8 T cells (Ficoll versus 4C or RT)	REACTOME_DESTABILIZATION_OF_MRNA_BY_TRISTETRAPROLIN_TTP	0.141901	0.0281634	0.916605	0.422725
CD8 T cells (Ficoll versus 4C or RT)	REACTOME_NETRIN1_SIGNALING	0.602665	0.0286914	0.916605	0.422725
CD8 T cells (Ficoll versus 4C or RT)	BIOCARTA_MCALPAIN_PATHWAY	0.432776	0.0289977	0.916605	0.422725
CD8 T cells (Ficoll versus 4C or RT)	KEGG_P53_SIGNALING_PATHWAY	0.610758	0.0292148	0.916605	0.422725
CD8 T cells (Ficoll versus 4C or RT)	REACTOME_SIGNALING_BY_CONSTITUTIVELY_ACTIVE_EGFR	0.618996	0.0296407	0.916605	0.422725
CD8 T cells (Ficoll versus 4C or RT)	BIOCARTA_HER2_PATHWAY	0.053818	0.0299075	0.916605	0.422725
CD8 T cells (Ficoll versus 4C or RT)	PID_TELOMERASE_PATHWAY	0.754772	0.0299158	0.926481	0.422725
CD8 T cells (Ficoll versus 4C or RT)	REACTOME_SHC_MEDIATED_CASCADE	0.634639	0.0305909	0.916605	0.422725
CD8 T cells (Ficoll versus 4C or RT)	KEGG_MAPK_SIGNALING_PATHWAY	0.661573	0.030735	0.916605	0.422725
CD8 T cells (Ficoll versus 4C or RT)	REACTOME_ADENYLATE_CYCLASE_INHIBITORY_PATHWAY	0.291725	0.0307723	0.916605	0.422725
CD8 T cells (Ficoll versus 4C or RT)	KEGG_TGF_BETA_SIGNALING_PATHWAY	0.920804	0.0309825	0.973948	0.422725
CD8 T cells (Ficoll versus 4C or RT)	REACTOME_HEMOSTASIS	0.223786	0.0315754	0.916605	0.422725
CD8 T cells (Ficoll versus 4C or RT)	REACTOME_RESPONSE_TO_ELEVATED_PLATELET_CYTOSOLIC_CA2_	0.296707	0.0316985	0.916605	0.422725
CD8 T cells (Ficoll versus 4C or RT)	REACTOME_PLATELET_ACTIVATION_SIGNALING_AND_AGGREGATION	0.310399	0.0321053	0.916605	0.422725
CD8 T cells (Ficoll versus 4C or RT)	PID_THROMBIN_PAR1_PATHWAY	0.272461	0.0322681	0.916605	0.422725
CD8 T cells (Ficoll versus 4C or RT)	KEGG_CELL_ADHESION_MOLECULES_CAMS	0.282968	0.0324799	0.916605	0.422725
CD8 T cells (Ficoll versus 4C or RT)	KEGG_HYPERTROPHIC_CARDIOMYOPATHY_HCM	0.521971	0.0337619	0.916605	0.422725
CD8 T cells (Ficoll versus 4C or RT)	BIOCARTA_LAIR_PATHWAY	0.35317	0.0342223	0.916605	0.422725
CD8 T cells (Ficoll versus 4C or RT)	BIOCARTA_TPO_PATHWAY	0.365717	0.0344147	0.916605	0.422725
CD8 T cells (Ficoll versus 4C or RT)	KEGG_GLYCEROLIPID_METABOLISM	0.109252	0.0347078	0.916605	0.422725
CD8 T cells (Ficoll versus 4C or RT)	REACTOME_NITRIC_OXIDE_STIMULATES_GUANYLATE_CYCLASE	0.912001	0.0350455	0.972677	0.422725
CD8 T cells (Ficoll versus 4C or RT)	KEGG_ASTHMA	0.390826	0.0351514	0.916605	0.422725
CD8 T cells (Ficoll versus 4C or RT)	BIOCARTA_CDC42RAC_PATHWAY	0.991953	0.035198	0.995097	0.422725
CD8 T cells (Ficoll versus 4C or RT)	REACTOME_PLATELET_SENSITIZATION_BY_LDL	0.475203	0.0354988	0.916605	0.422725
CD8 T cells (Ficoll versus 4C or RT)	BIOCARTA_CXCR4_PATHWAY	0.395961	0.0356283	0.916605	0.422725
CD8 T cells (Ficoll versus 4C or RT)	REACTOME_REGULATION_OF_MITOTIC_CELL_CYCLE	0.658904	0.0357664	0.916605	0.422725
CD8 T cells (Ficoll versus 4C or RT)	REACTOME_PI3K_CASCADE	0.226995	0.0366843	0.916605	0.428963
CD8 T cells (Ficoll versus 4C or RT)	PID_THROMBIN_PAR4_PATHWAY	0.14758	0.0370976	0.916605	0.428963
CD8 T cells (Ficoll versus 4C or RT)	KEGG_THYROID_CANCER	0.408548	0.0373312	0.916605	0.428963
CD8 T cells (Ficoll versus 4C or RT)	SA_PROGRAMMED_CELL_DEATH	0.568305	0.0379359	0.916605	0.429635
CD8 T cells (Ficoll versus 4C or RT)	KEGG_SYSTEMIC_LUPUS_ERYTHEMATOSUS	0.63937	0.0380821	0.916605	0.429635
CD8 T cells (Ficoll versus 4C or RT)	PID_BCR_5PATHWAY	0.441841	0.0404616	0.916605	0.447526
CD8 T cells (Ficoll versus 4C or RT)	KEGG_BETA_ALANINE_METABOLISM	0.438707	0.0405102	0.916605	0.447526
CD8 T cells (Ficoll versus 4C or RT)	BIOCARTA_INTEGRIN_PATHWAY	0.404123	0.040894	0.916605	0.447526
CD8 T cells (Ficoll versus 4C or RT)	PID_HIF2PATHWAY	0.594761	0.0411103	0.916605	0.447526
CD8 T cells (Ficoll versus 4C or RT)	PID_ANTHRAX_PATHWAY	0.337558	0.0415852	0.916605	0.448379
CD8 T cells (Ficoll versus 4C or RT)	REACTOME_SIGNALING_BY_FGFR_MUTANTS	0.928612	0.0419114	0.974964	0.448379
CD8 T cells (Ficoll versus 4C or RT)	PID_S1P_S1P1_PATHWAY	0.354257	0.0430513	0.916605	0.451448
CD8 T cells (Ficoll versus 4C or RT)	BIOCARTA_VEGF_PATHWAY	0.659678	0.0433965	0.916605	0.451448
CD8 T cells (Ficoll versus 4C or RT)	REACTOME_PROSTACYCLIN_SIGNALLING_THROUGH_PROSTACYCLIN_RECEPTOR	0.191752	0.0434156	0.916605	0.451448
CD8 T cells (Ficoll versus 4C or RT)	PID_FCER1_PATHWAY	0.333924	0.0438913	0.916605	0.451448
CD8 T cells (Ficoll versus 4C or RT)	REACTOME_SYNTHESIS_AND_INTERCONVERSION_OF_NUCLEOTIDE_DI_AND_TRIPHOSPHATES	0.769472	0.0442378	0.937966	0.451448
CD8 T cells (Ficoll versus 4C or RT)	KEGG_MELANOMA	0.370781	0.0446407	0.916605	0.451448
CD8 T cells (Ficoll versus 4C or RT)	REACTOME_TRANSCRIPTIONAL_ACTIVITY_OF_SMAD2_SMAD3_SMAD4_HETEROTRIMER	0.912325	0.0447446	0.972677	0.451448
CD8 T cells (Ficoll versus 4C or RT)	REACTOME_ABORTIVE_ELONGATION_OF_HIV1_TRANSCRIPT_IN_THE_ABSENCE_OF_TAT	0.929614	0.0457355	0.975191	0.457724
CD8 T cells (Ficoll versus 4C or RT)	REACTOME_ACYL_CHAIN_REMODELLING_OF_PG	0.324588	0.0462734	0.916605	0.459402
CD8 T cells (Ficoll versus 4C or RT)	REACTOME_MHC_CLASS_II_ANTIGEN_PRESENTATION	0.288594	0.0467503	0.916605	0.460453
CD8 T cells (Ficoll versus 4C or RT)	REACTOME_SYNTHESIS_OF_BILE_ACIDS_AND_BILE_SALTS_VIA_7ALPHA_HYDROXYCHOLESTEROL	0.408322	0.0475462	0.916605	0.462158
CD8 T cells (Ficoll versus 4C or RT)	REACTOME_METABOLISM_OF_MRNA	0.284588	0.0479693	0.916605	0.462158
CD8 T cells (Ficoll versus 4C or RT)	REACTOME_FORMATION_OF_FIBRIN_CLOT_CLOTTING_CASCADE	0.067948	0.0482201	0.916605	0.462158
CD8 T cells (Ficoll versus 4C or RT)	BIOCARTA_IGF1_PATHWAY	0.676463	0.0487004	0.916605	0.462158
CD8 T cells (Ficoll versus 4C or RT)	REACTOME_GABA_B_RECEPTOR_ACTIVATION	0.462899	0.0489236	0.916605	0.462158
CD8 T cells (Ficoll versus 4C or RT)	KEGG_FRUCTOSE_AND_MANNOSE_METABOLISM	0.598137	0.0492544	0.916605	0.462158
CD8 T cells (Ficoll versus 4C or RT)	PID_P75_NTR_PATHWAY	0.0258183	0.00434987	0.916605	0.314315
CD8 T cells (Ficoll versus 4C or RT)	BIOCARTA_CELLCYCLE_PATHWAY	0.00587736	0.0325879	0.916605	0.422725
Comparison	Gene Set	Ficoll versus Collagenase+Percoll (P value)	Ficoll versusWhole Blood Lysis (P value)	Ficoll versus Collagenase+Percoll (FDR)	Ficoll versusWhole Blood Lysis (FDR)
Monocytes (Ficoll versus Lysed or Percoll)	BIOCARTA_CYTOKINE_PATHWAY	3.62315e-05	0.703944	0.0466661	0.78297
Monocytes (Ficoll versus Lysed or Percoll)	BIOCARTA_TH1TH2_PATHWAY	0.000586362	0.973177	0.0682446	0.979764
Monocytes (Ficoll versus Lysed or Percoll)	PID_ATF2_PATHWAY	0.000614141	0.676432	0.0682446	0.758923
Monocytes (Ficoll versus Lysed or Percoll)	PID_IL23_PATHWAY	0.000310253	0.0515549	0.0682446	0.286673
Monocytes (Ficoll versus Lysed or Percoll)	REACTOME_KERATAN_SULFATE_KERATIN_METABOLISM	0.000337328	0.0654548	0.0682446	0.302364
Monocytes (Ficoll versus Lysed or Percoll)	REACTOME_INTEGRIN_CELL_SURFACE_INTERACTIONS	0.000428752	0.0516043	0.0682446	0.286673
Monocytes (Ficoll versus Lysed or Percoll)	REACTOME_LAGGING_STRAND_SYNTHESIS	0.000197134	0.179694	0.0682446	0.360588
Monocytes (Ficoll versus Lysed or Percoll)	REACTOME_HEMOSTASIS	0.00051426	0.169049	0.0682446	0.354692
Monocytes (Ficoll versus Lysed or Percoll)	BIOCARTA_NO1_PATHWAY	0.000508445	0.000298174	0.0682446	0.206594
Monocytes (Ficoll versus Lysed or Percoll)	BIOCARTA_INFLAM_PATHWAY	0.000369568	0.0088211	0.0682446	0.245601
Monocytes (Ficoll versus Lysed or Percoll)	PID_VEGF_VEGFR_PATHWAY	0.000635819	0.00901152	0.0682446	0.245601
Monocytes (Ficoll versus Lysed or Percoll)	REACTOME_VEGF_LIGAND_RECEPTOR_INTERACTIONS	0.000302851	0.016072	0.0682446	0.245601
Monocytes (Ficoll versus Lysed or Percoll)	KEGG_GLYCOSAMINOGLYCAN_BIOSYNTHESIS_KERATAN_SULFATE	0.000977306	0.618345	0.084462	0.714937
Monocytes (Ficoll versus Lysed or Percoll)	KEGG_ERBB_SIGNALING_PATHWAY	0.000983641	0.34797	0.084462	0.48822
Monocytes (Ficoll versus Lysed or Percoll)	REACTOME_RIP_MEDIATED_NFKB_ACTIVATION_VIA_DAI	0.00093418	0.619662	0.084462	0.714937
Monocytes (Ficoll versus Lysed or Percoll)	PID_IL2_PI3K_PATHWAY	0.00106218	0.101189	0.0855055	0.316331
Monocytes (Ficoll versus Lysed or Percoll)	PID_SMAD2_3NUCLEAR_PATHWAY	0.00118539	0.314764	0.0876263	0.461085
Monocytes (Ficoll versus Lysed or Percoll)	ST_GA13_PATHWAY	0.00122459	0.00683051	0.0876263	0.245601
Monocytes (Ficoll versus Lysed or Percoll)	KEGG_JAK_STAT_SIGNALING_PATHWAY	0.00146843	0.829396	0.0995444	0.871339
Monocytes (Ficoll versus Lysed or Percoll)	BIOCARTA_FIBRINOLYSIS_PATHWAY	0.00156998	0.179487	0.101107	0.360588
Monocytes (Ficoll versus Lysed or Percoll)	REACTOME_SIGNAL_AMPLIFICATION	0.00177144	0.0378857	0.108648	0.285976
Monocytes (Ficoll versus Lysed or Percoll)	KEGG_MAPK_SIGNALING_PATHWAY	0.00186889	0.227353	0.109415	0.390408
Monocytes (Ficoll versus Lysed or Percoll)	BIOCARTA_DC_PATHWAY	0.00221818	0.921308	0.124218	0.944029
Monocytes (Ficoll versus Lysed or Percoll)	KEGG_STARCH_AND_SUCROSE_METABOLISM	0.00301494	0.68133	0.127382	0.763667
Monocytes (Ficoll versus Lysed or Percoll)	KEGG_CYTOKINE_CYTOKINE_RECEPTOR_INTERACTION	0.00282036	0.377157	0.127382	0.515688
Monocytes (Ficoll versus Lysed or Percoll)	KEGG_COMPLEMENT_AND_COAGULATION_CASCADES	0.00310157	0.16432	0.127382	0.354692
Monocytes (Ficoll versus Lysed or Percoll)	KEGG_INTESTINAL_IMMUNE_NETWORK_FOR_IGA_PRODUCTION	0.00252123	0.462967	0.127382	0.583466
Monocytes (Ficoll versus Lysed or Percoll)	BIOCARTA_ERYTH_PATHWAY	0.00345175	0.28299	0.127382	0.432781
Monocytes (Ficoll versus Lysed or Percoll)	PID_NFKAPPAB_ATYPICAL_PATHWAY	0.00322478	0.152657	0.127382	0.347866
Monocytes (Ficoll versus Lysed or Percoll)	PID_AP1_PATHWAY	0.00253919	0.901522	0.127382	0.927444
Monocytes (Ficoll versus Lysed or Percoll)	PID_INTEGRIN5_PATHWAY	0.00340326	0.0745323	0.127382	0.304448
Monocytes (Ficoll versus Lysed or Percoll)	REACTOME_KERATAN_SULFATE_BIOSYNTHESIS	0.00323126	0.524992	0.127382	0.635517
Monocytes (Ficoll versus Lysed or Percoll)	REACTOME_REGULATION_OF_PYRUVATE_DEHYDROGENASE_PDH_COMPLEX	0.00327732	0.133167	0.127382	0.336972
Monocytes (Ficoll versus Lysed or Percoll)	REACTOME_EXTENSION_OF_TELOMERES	0.00264126	0.283573	0.127382	0.432781
Monocytes (Ficoll versus Lysed or Percoll)	KEGG_VALINE_LEUCINE_AND_ISOLEUCINE_DEGRADATION	0.00346147	0.042839	0.127382	0.286673
Monocytes (Ficoll versus Lysed or Percoll)	REACTOME_GLYCOPROTEIN_HORMONES	0.00361159	0.0169709	0.129215	0.245601
Monocytes (Ficoll versus Lysed or Percoll)	KEGG_BETA_ALANINE_METABOLISM	0.00385452	0.476005	0.130648	0.593663
Monocytes (Ficoll versus Lysed or Percoll)	PID_PTP1B_PATHWAY	0.00384008	0.625877	0.130648	0.719117
Monocytes (Ficoll versus Lysed or Percoll)	KEGG_BUTANOATE_METABOLISM	0.0042064	0.559358	0.131834	0.662673
Monocytes (Ficoll versus Lysed or Percoll)	BIOCARTA_EXTRINSIC_PATHWAY	0.00429892	0.16157	0.131834	0.352716
Monocytes (Ficoll versus Lysed or Percoll)	BIOCARTA_TEL_PATHWAY	0.00412498	0.931207	0.131834	0.950826
Monocytes (Ficoll versus Lysed or Percoll)	PID_A6B1_A6B4_INTEGRIN_PATHWAY	0.00415416	0.0465784	0.131834	0.286673
Monocytes (Ficoll versus Lysed or Percoll)	REACTOME_IL_RECEPTOR_SHC_SIGNALING	0.00441122	0.840915	0.132132	0.879138
Monocytes (Ficoll versus Lysed or Percoll)	KEGG_BASE_EXCISION_REPAIR	0.00480137	0.0116934	0.140549	0.245601
Monocytes (Ficoll versus Lysed or Percoll)	KEGG_FATTY_ACID_METABOLISM	0.00505799	0.807723	0.144771	0.856959
Monocytes (Ficoll versus Lysed or Percoll)	KEGG_GLYCOLYSIS_GLUCONEOGENESIS	0.00567071	0.973678	0.151108	0.979764
Monocytes (Ficoll versus Lysed or Percoll)	KEGG_PYRUVATE_METABOLISM	0.00568677	0.0558186	0.151108	0.292434
Monocytes (Ficoll versus Lysed or Percoll)	KEGG_HEMATOPOIETIC_CELL_LINEAGE	0.00546298	0.405402	0.151108	0.537284
Monocytes (Ficoll versus Lysed or Percoll)	PID_IL27_PATHWAY	0.00583288	0.0833773	0.151108	0.307503
Monocytes (Ficoll versus Lysed or Percoll)	REACTOME_CTLA4_INHIBITORY_SIGNALING	0.00591813	0.541822	0.151108	0.649783
Monocytes (Ficoll versus Lysed or Percoll)	REACTOME_AMINO_ACID_AND_OLIGOPEPTIDE_SLC_TRANSPORTERS	0.00601157	0.058607	0.151108	0.296023
Monocytes (Ficoll versus Lysed or Percoll)	REACTOME_MYOGENESIS	0.00610065	0.744377	0.151108	0.81166
Monocytes (Ficoll versus Lysed or Percoll)	REACTOME_GLOBAL_GENOMIC_NER_GG_NER	0.00626782	0.0103154	0.15232	0.245601
Monocytes (Ficoll versus Lysed or Percoll)	BIOCARTA_PPARA_PATHWAY	0.00710153	0.0792029	0.163335	0.305451
Monocytes (Ficoll versus Lysed or Percoll)	REACTOME_PROCESSIVE_SYNTHESIS_ON_THE_LAGGING_STRAND	0.00686539	0.207195	0.163335	0.373763
Monocytes (Ficoll versus Lysed or Percoll)	KEGG_PROPANOATE_METABOLISM	0.0070381	0.0391835	0.163335	0.286673
Monocytes (Ficoll versus Lysed or Percoll)	KEGG_VIRAL_MYOCARDITIS	0.00731842	0.191435	0.165371	0.367452
Monocytes (Ficoll versus Lysed or Percoll)	REACTOME_P2Y_RECEPTORS	0.00793373	0.0403814	0.176184	0.286673
Monocytes (Ficoll versus Lysed or Percoll)	BIOCARTA_ERK_PATHWAY	0.00988364	0.5311	0.184495	0.641103
Monocytes (Ficoll versus Lysed or Percoll)	BIOCARTA_STEM_PATHWAY	0.00941139	0.0560801	0.184495	0.292434
Monocytes (Ficoll versus Lysed or Percoll)	PID_HDAC_CLASSII_PATHWAY	0.00954793	0.111273	0.184495	0.318935
Monocytes (Ficoll versus Lysed or Percoll)	PID_INTEGRIN_A9B1_PATHWAY	0.00983636	0.244293	0.184495	0.404397
Monocytes (Ficoll versus Lysed or Percoll)	REACTOME_CELL_SURFACE_INTERACTIONS_AT_THE_VASCULAR_WALL	0.00960951	0.50456	0.184495	0.620108
Monocytes (Ficoll versus Lysed or Percoll)	REACTOME_POL_SWITCHING	0.00911959	0.205658	0.184495	0.372218
Monocytes (Ficoll versus Lysed or Percoll)	REACTOME_INHIBITION_OF_VOLTAGE_GATED_CA2_CHANNELS_VIA_GBETA_GAMMA_SUBUNITS	0.00947601	0.620574	0.184495	0.714937
Monocytes (Ficoll versus Lysed or Percoll)	BIOCARTA_IL1R_PATHWAY	0.00852949	0.0346716	0.184495	0.285976
Monocytes (Ficoll versus Lysed or Percoll)	PID_AJDISS_2PATHWAY	0.00914093	0.0248399	0.184495	0.283131
Monocytes (Ficoll versus Lysed or Percoll)	PID_INTEGRIN4_PATHWAY	0.00915193	0.0397181	0.184495	0.286673
Monocytes (Ficoll versus Lysed or Percoll)	NABA_SECRETED_FACTORS	0.00870265	0.044551	0.184495	0.286673
Monocytes (Ficoll versus Lysed or Percoll)	KEGG_GLYCOSYLPHOSPHATIDYLINOSITOL_GPI_ANCHOR_BIOSYNTHESIS	0.0102403	0.407616	0.185327	0.538472
Monocytes (Ficoll versus Lysed or Percoll)	PID_HIF1_TFPATHWAY	0.0102144	0.918564	0.185327	0.941967
Monocytes (Ficoll versus Lysed or Percoll)	REACTOME_PASSIVE_TRANSPORT_BY_AQUAPORINS	0.0103599	0.378457	0.185327	0.516369
Monocytes (Ficoll versus Lysed or Percoll)	KEGG_CELL_ADHESION_MOLECULES_CAMS	0.0109092	0.18797	0.185372	0.367013
Monocytes (Ficoll versus Lysed or Percoll)	KEGG_PRION_DISEASES	0.011052	0.115683	0.185372	0.323913
Monocytes (Ficoll versus Lysed or Percoll)	BIOCARTA_IL12_PATHWAY	0.011082	0.366745	0.185372	0.505747
Monocytes (Ficoll versus Lysed or Percoll)	PID_CD40_PATHWAY	0.0105432	0.83787	0.185372	0.878093
Monocytes (Ficoll versus Lysed or Percoll)	PID_SHP2_PATHWAY	0.0109085	0.388537	0.185372	0.522922
Monocytes (Ficoll versus Lysed or Percoll)	PID_IL12_2PATHWAY	0.0113303	0.593522	0.187096	0.69308
Monocytes (Ficoll versus Lysed or Percoll)	SA_TRKA_RECEPTOR	0.0120409	0.727015	0.189131	0.796932
Monocytes (Ficoll versus Lysed or Percoll)	REACTOME_REVERSIBLE_HYDRATION_OF_CARBON_DIOXIDE	0.0118791	0.191726	0.189131	0.367452
Monocytes (Ficoll versus Lysed or Percoll)	REACTOME_PYRUVATE_METABOLISM	0.0120137	0.485618	0.189131	0.601998
Monocytes (Ficoll versus Lysed or Percoll)	REACTOME_N_GLYCAN_ANTENNAE_ELONGATION	0.011645	0.835524	0.189131	0.876851
Monocytes (Ficoll versus Lysed or Percoll)	KEGG_REGULATION_OF_ACTIN_CYTOSKELETON	0.0123247	0.17389	0.191256	0.35704
Monocytes (Ficoll versus Lysed or Percoll)	PID_DELTA_NP63_PATHWAY	0.0127192	0.0523044	0.195028	0.286673
Monocytes (Ficoll versus Lysed or Percoll)	BIOCARTA_EDG1_PATHWAY	0.0133794	0.0834293	0.20038	0.307503
Monocytes (Ficoll versus Lysed or Percoll)	PID_LYSOPHOSPHOLIPID_PATHWAY	0.0132411	0.725202	0.20038	0.795622
Monocytes (Ficoll versus Lysed or Percoll)	REACTOME_TRANS_GOLGI_NETWORK_VESICLE_BUDDING	0.0135712	0.0671647	0.200916	0.303537
Monocytes (Ficoll versus Lysed or Percoll)	KEGG_ALDOSTERONE_REGULATED_SODIUM_REABSORPTION	0.013787	0.720648	0.201792	0.792442
Monocytes (Ficoll versus Lysed or Percoll)	PID_GLYPICAN_1PATHWAY	0.0144546	0.493147	0.208228	0.609571
Monocytes (Ficoll versus Lysed or Percoll)	PID_WNT_SIGNALING_PATHWAY	0.0145501	0.162757	0.208228	0.354106
Monocytes (Ficoll versus Lysed or Percoll)	KEGG_RETINOL_METABOLISM	0.0148807	0.16811	0.210619	0.354692
Monocytes (Ficoll versus Lysed or Percoll)	BIOCARTA_AKT_PATHWAY	0.0151687	0.767672	0.212362	0.826594
Monocytes (Ficoll versus Lysed or Percoll)	REACTOME_FORMATION_OF_INCISION_COMPLEX_IN_GG_NER	0.0153484	0.110387	0.212567	0.318073
Monocytes (Ficoll versus Lysed or Percoll)	KEGG_ADIPOCYTOKINE_SIGNALING_PATHWAY	0.015621	0.803124	0.214041	0.854189
Monocytes (Ficoll versus Lysed or Percoll)	REACTOME_DNA_STRAND_ELONGATION	0.0159785	0.419761	0.216635	0.548782
Monocytes (Ficoll versus Lysed or Percoll)	KEGG_LYSINE_DEGRADATION	0.0168412	0.16913	0.224956	0.354692
Monocytes (Ficoll versus Lysed or Percoll)	REACTOME_GOLGI_ASSOCIATED_VESICLE_BIOGENESIS	0.0169416	0.0509844	0.224956	0.286673
Monocytes (Ficoll versus Lysed or Percoll)	REACTOME_AMINO_ACID_TRANSPORT_ACROSS_THE_PLASMA_MEMBRANE	0.0176114	0.0614066	0.229126	0.30038
Monocytes (Ficoll versus Lysed or Percoll)	REACTOME_SIGNALING_BY_NOTCH4	0.017536	0.00350689	0.229126	0.245601
Monocytes (Ficoll versus Lysed or Percoll)	REACTOME_GLYCOLYSIS	0.0179726	0.0530409	0.229776	0.287045
Monocytes (Ficoll versus Lysed or Percoll)	REACTOME_N_GLYCAN_ANTENNAE_ELONGATION_IN_THE_MEDIAL_TRANS_GOLGI	0.0180182	0.510741	0.229776	0.624131
Monocytes (Ficoll versus Lysed or Percoll)	KEGG_AMINOACYL_TRNA_BIOSYNTHESIS	0.0183616	0.0066926	0.231861	0.245601
Monocytes (Ficoll versus Lysed or Percoll)	PID_TXA2PATHWAY	0.0193711	0.137404	0.242233	0.342514
Monocytes (Ficoll versus Lysed or Percoll)	REACTOME_APOPTOSIS_INDUCED_DNA_FRAGMENTATION	0.0198242	0.253143	0.245515	0.409095
Monocytes (Ficoll versus Lysed or Percoll)	KEGG_TYPE_I_DIABETES_MELLITUS	0.0205012	0.0896961	0.250843	0.309678
Monocytes (Ficoll versus Lysed or Percoll)	NABA_MATRISOME_ASSOCIATED	0.0206439	0.048971	0.250843	0.286673
Monocytes (Ficoll versus Lysed or Percoll)	KEGG_RIBOSOME	0.0220282	0.57102	0.258029	0.671666
Monocytes (Ficoll versus Lysed or Percoll)	PID_IL1_PATHWAY	0.0220859	0.0989536	0.258029	0.316331
Monocytes (Ficoll versus Lysed or Percoll)	PID_ERBB_NETWORK_PATHWAY	0.0216415	0.19533	0.258029	0.371068
Monocytes (Ficoll versus Lysed or Percoll)	REACTOME_BASE_EXCISION_REPAIR	0.022237	0.107141	0.258029	0.31651
Monocytes (Ficoll versus Lysed or Percoll)	KEGG_GRAFT_VERSUS_HOST_DISEASE	0.0221869	0.0287554	0.258029	0.285691
Monocytes (Ficoll versus Lysed or Percoll)	KEGG_LEISHMANIA_INFECTION	0.0227886	0.142005	0.262069	0.342836
Monocytes (Ficoll versus Lysed or Percoll)	KEGG_VEGF_SIGNALING_PATHWAY	0.0236943	0.801575	0.267817	0.853952
Monocytes (Ficoll versus Lysed or Percoll)	REACTOME_CTNNB1_PHOSPHORYLATION_CASCADE	0.0243358	0.202217	0.267817	0.372069
Monocytes (Ficoll versus Lysed or Percoll)	REACTOME_G_ALPHA_S_SIGNALLING_EVENTS	0.024743	0.297285	0.267817	0.447229
Monocytes (Ficoll versus Lysed or Percoll)	REACTOME_TRANSPORT_OF_INORGANIC_CATIONS_ANIONS_AND_AMINO_ACIDS_OLIGOPEPTIDES	0.0248063	0.0658757	0.267817	0.302364
Monocytes (Ficoll versus Lysed or Percoll)	REACTOME_METAL_ION_SLC_TRANSPORTERS	0.0242325	0.112277	0.267817	0.318935
Monocytes (Ficoll versus Lysed or Percoll)	REACTOME_TELOMERE_MAINTENANCE	0.0249519	0.180294	0.267817	0.360588
Monocytes (Ficoll versus Lysed or Percoll)	REACTOME_REMOVAL_OF_THE_FLAP_INTERMEDIATE_FROM_THE_C_STRAND	0.0245433	0.130374	0.267817	0.336098
Monocytes (Ficoll versus Lysed or Percoll)	REACTOME_DNA_REPAIR	0.0242422	0.0202038	0.267817	0.250216
Monocytes (Ficoll versus Lysed or Percoll)	REACTOME_BASIGIN_INTERACTIONS	0.0252962	0.00364207	0.269269	0.245601
Monocytes (Ficoll versus Lysed or Percoll)	ST_ADRENERGIC	0.025559	0.245637	0.269836	0.404579
Monocytes (Ficoll versus Lysed or Percoll)	KEGG_AUTOIMMUNE_THYROID_DISEASE	0.026192	0.166815	0.272059	0.354692
Monocytes (Ficoll versus Lysed or Percoll)	REACTOME_SIGNALING_BY_GPCR	0.0260329	0.154753	0.272059	0.347866
Monocytes (Ficoll versus Lysed or Percoll)	KEGG_CALCIUM_SIGNALING_PATHWAY	0.0264204	0.142506	0.272236	0.342836
Monocytes (Ficoll versus Lysed or Percoll)	KEGG_PROSTATE_CANCER	0.0271041	0.336492	0.275005	0.476864
Monocytes (Ficoll versus Lysed or Percoll)	REACTOME_HS_GAG_BIOSYNTHESIS	0.0272116	0.817493	0.275005	0.861704
Monocytes (Ficoll versus Lysed or Percoll)	REACTOME_TRNA_AMINOACYLATION	0.0273296	0.0182802	0.275005	0.250216
Monocytes (Ficoll versus Lysed or Percoll)	PID_PS1_PATHWAY	0.027655	0.0385193	0.276121	0.286623
Monocytes (Ficoll versus Lysed or Percoll)	KEGG_PEROXISOME	0.0279503	0.0328643	0.276923	0.285976
Monocytes (Ficoll versus Lysed or Percoll)	REACTOME_REPAIR_SYNTHESIS_FOR_GAP_FILLING_BY_DNA_POL_IN_TC_NER	0.0286436	0.231539	0.281625	0.392447
Monocytes (Ficoll versus Lysed or Percoll)	REACTOME_RESOLUTION_OF_AP_SITES_VIA_THE_SINGLE_NUCLEOTIDE_REPLACEMENT_PATHWAY	0.0292393	0.630186	0.285305	0.722778
Monocytes (Ficoll versus Lysed or Percoll)	BIOCARTA_NO2IL12_PATHWAY	0.0296102	0.225982	0.286752	0.389645
Monocytes (Ficoll versus Lysed or Percoll)	KEGG_MELANOGENESIS	0.0300141	0.267507	0.287196	0.420695
Monocytes (Ficoll versus Lysed or Percoll)	PID_ECADHERIN_KERATINOCYTE_PATHWAY	0.0301021	0.252866	0.287196	0.409095
Monocytes (Ficoll versus Lysed or Percoll)	KEGG_PATHWAYS_IN_CANCER	0.0311599	0.155651	0.292948	0.347866
Monocytes (Ficoll versus Lysed or Percoll)	REACTOME_SIGNALING_BY_NOTCH3	0.0309728	0.00761747	0.292948	0.245601
Monocytes (Ficoll versus Lysed or Percoll)	REACTOME_SYNTHESIS_OF_PIPS_AT_THE_PLASMA_MEMBRANE	0.0314225	0.423292	0.293277	0.551822
Monocytes (Ficoll versus Lysed or Percoll)	KEGG_PROXIMAL_TUBULE_BICARBONATE_RECLAMATION	0.0329938	0.117739	0.29718	0.325936
Monocytes (Ficoll versus Lysed or Percoll)	PID_BETA_CATENIN_NUC_PATHWAY	0.0329943	0.0593057	0.29718	0.297221
Monocytes (Ficoll versus Lysed or Percoll)	REACTOME_TAK1_ACTIVATES_NFKB_BY_PHOSPHORYLATION_AND_ACTIVATION_OF_IKKS_COMPLEX	0.0326797	0.342118	0.29718	0.483697
Monocytes (Ficoll versus Lysed or Percoll)	KEGG_FOCAL_ADHESION	0.0321571	0.0169403	0.29718	0.245601
Monocytes (Ficoll versus Lysed or Percoll)	KEGG_MELANOMA	0.0327807	0.00930093	0.29718	0.245601
Monocytes (Ficoll versus Lysed or Percoll)	REACTOME_RNA_POL_III_TRANSCRIPTION	0.0339512	0.0346123	0.303675	0.285976
Monocytes (Ficoll versus Lysed or Percoll)	KEGG_FC_EPSILON_RI_SIGNALING_PATHWAY	0.034262	0.614966	0.304341	0.713582
Monocytes (Ficoll versus Lysed or Percoll)	BIOCARTA_RANMS_PATHWAY	0.0349323	0.742853	0.306073	0.811596
Monocytes (Ficoll versus Lysed or Percoll)	REACTOME_AQUAPORIN_MEDIATED_TRANSPORT	0.0349103	0.430263	0.306073	0.555847
Monocytes (Ficoll versus Lysed or Percoll)	KEGG_GLYOXYLATE_AND_DICARBOXYLATE_METABOLISM	0.0358816	0.0662007	0.30685	0.302364
Monocytes (Ficoll versus Lysed or Percoll)	KEGG_B_CELL_RECEPTOR_SIGNALING_PATHWAY	0.0370979	0.131691	0.30685	0.336543
Monocytes (Ficoll versus Lysed or Percoll)	KEGG_TYPE_II_DIABETES_MELLITUS	0.0365277	0.156756	0.30685	0.347866
Monocytes (Ficoll versus Lysed or Percoll)	PID_FRA_PATHWAY	0.0367041	0.154855	0.30685	0.347866
Monocytes (Ficoll versus Lysed or Percoll)	REACTOME_SIGNALING_BY_FGFR_MUTANTS	0.0367718	0.152669	0.30685	0.347866
Monocytes (Ficoll versus Lysed or Percoll)	REACTOME_REGULATION_OF_INSULIN_SECRETION	0.0368855	0.315027	0.30685	0.461085
Monocytes (Ficoll versus Lysed or Percoll)	REACTOME_ZINC_TRANSPORTERS	0.035575	0.156207	0.30685	0.347866
Monocytes (Ficoll versus Lysed or Percoll)	BIOCARTA_IL17_PATHWAY	0.0371651	0.0196343	0.30685	0.250216
Monocytes (Ficoll versus Lysed or Percoll)	REACTOME_DOPAMINE_NEUROTRANSMITTER_RELEASE_CYCLE	0.0362547	0.031497	0.30685	0.285691
Monocytes (Ficoll versus Lysed or Percoll)	REACTOME_NFKB_IS_ACTIVATED_AND_SIGNALS_SURVIVAL	0.0376112	0.516356	0.308555	0.629798
Monocytes (Ficoll versus Lysed or Percoll)	BIOCARTA_HSP27_PATHWAY	0.0383031	0.151937	0.309103	0.347866
Monocytes (Ficoll versus Lysed or Percoll)	REACTOME_PEPTIDE_HORMONE_BIOSYNTHESIS	0.0383731	0.195188	0.309103	0.371068
Monocytes (Ficoll versus Lysed or Percoll)	REACTOME_OTHER_SEMAPHORIN_INTERACTIONS	0.0383979	0.146116	0.309103	0.344129
Monocytes (Ficoll versus Lysed or Percoll)	KEGG_ENDOMETRIAL_CANCER	0.0409824	0.553547	0.313148	0.657309
Monocytes (Ficoll versus Lysed or Percoll)	BIOCARTA_NKT_PATHWAY	0.0410886	0.437018	0.313148	0.560911
Monocytes (Ficoll versus Lysed or Percoll)	WNT_SIGNALING	0.0400798	0.269983	0.313148	0.423092
Monocytes (Ficoll versus Lysed or Percoll)	REACTOME_PYRUVATE_METABOLISM_AND_CITRIC_ACID_TCA_CYCLE	0.0398762	0.217618	0.313148	0.381869
Monocytes (Ficoll versus Lysed or Percoll)	REACTOME_NOD1_2_SIGNALING_PATHWAY	0.0398627	0.190381	0.313148	0.367452
Monocytes (Ficoll versus Lysed or Percoll)	REACTOME_TANDEM_PORE_DOMAIN_POTASSIUM_CHANNELS	0.0408954	0.662879	0.313148	0.748281
Monocytes (Ficoll versus Lysed or Percoll)	KEGG_ECM_RECEPTOR_INTERACTION	0.0401747	0.0488132	0.313148	0.286673
Monocytes (Ficoll versus Lysed or Percoll)	REACTOME_SIGNALING_BY_NOTCH2	0.0405017	0.00403842	0.313148	0.245601
Monocytes (Ficoll versus Lysed or Percoll)	REACTOME_ADP_SIGNALLING_THROUGH_P2RY12	0.0393873	0.0129765	0.313148	0.245601
Monocytes (Ficoll versus Lysed or Percoll)	BIOCARTA_GABA_PATHWAY	0.0419726	0.051073	0.316145	0.286673
Monocytes (Ficoll versus Lysed or Percoll)	KEGG_SELENOAMINO_ACID_METABOLISM	0.0418144	0.0403131	0.316145	0.286673
Monocytes (Ficoll versus Lysed or Percoll)	KEGG_CITRATE_CYCLE_TCA_CYCLE	0.043025	0.0929731	0.317146	0.31063
Monocytes (Ficoll versus Lysed or Percoll)	KEGG_GLYCOSPHINGOLIPID_BIOSYNTHESIS_LACTO_AND_NEOLACTO_SERIES	0.0431517	0.0605879	0.317146	0.298993
Monocytes (Ficoll versus Lysed or Percoll)	KEGG_LONG_TERM_DEPRESSION	0.0441554	0.650017	0.317146	0.737363
Monocytes (Ficoll versus Lysed or Percoll)	SIG_BCR_SIGNALING_PATHWAY	0.0441535	0.740137	0.317146	0.809937
Monocytes (Ficoll versus Lysed or Percoll)	PID_RHOA_PATHWAY	0.0428738	0.0666647	0.317146	0.303407
Monocytes (Ficoll versus Lysed or Percoll)	PID_WNT_NONCANONICAL_PATHWAY	0.0441688	0.171184	0.317146	0.354851
Monocytes (Ficoll versus Lysed or Percoll)	PID_RXR_VDR_PATHWAY	0.0443216	0.130785	0.317146	0.336098
Monocytes (Ficoll versus Lysed or Percoll)	REACTOME_SIGNALING_BY_NODAL	0.042392	0.817549	0.317146	0.861704
Monocytes (Ficoll versus Lysed or Percoll)	REACTOME_RECEPTOR_LIGAND_BINDING_INITIATES_THE_SECOND_PROTEOLYTIC_CLEAVAGE_OF_NOTCH_RECEPTOR	0.0442855	0.00240339	0.317146	0.245601
Monocytes (Ficoll versus Lysed or Percoll)	REACTOME_PHOSPHORYLATION_OF_CD3_AND_TCR_ZETA_CHAINS	0.0451001	0.0547163	0.31891	0.290019
Monocytes (Ficoll versus Lysed or Percoll)	REACTOME_CLASS_B_2_SECRETIN_FAMILY_RECEPTORS	0.0448261	0.22817	0.31891	0.390408
Monocytes (Ficoll versus Lysed or Percoll)	KEGG_DRUG_METABOLISM_CYTOCHROME_P450	0.045311	0.0383076	0.31891	0.286623
Monocytes (Ficoll versus Lysed or Percoll)	BIOCARTA_ACH_PATHWAY	0.0457216	0.164955	0.320051	0.354692
Monocytes (Ficoll versus Lysed or Percoll)	REACTOME_ACTIVATED_NOTCH1_TRANSMITS_SIGNAL_TO_THE_NUCLEUS	0.0459918	0.00743996	0.320202	0.245601
Monocytes (Ficoll versus Lysed or Percoll)	REACTOME_POST_TRANSLATIONAL_MODIFICATION_SYNTHESIS_OF_GPI_ANCHORED_PROTEINS	0.0466329	0.438103	0.322921	0.560911
Monocytes (Ficoll versus Lysed or Percoll)	BIOCARTA_VITCB_PATHWAY	0.0488124	0.496964	0.332984	0.612645
Monocytes (Ficoll versus Lysed or Percoll)	PID_INTEGRIN3_PATHWAY	0.0487975	0.215147	0.332984	0.38132
Monocytes (Ficoll versus Lysed or Percoll)	REACTOME_CYTOSOLIC_SULFONATION_OF_SMALL_MOLECULES	0.0488618	0.836004	0.332984	0.876851
Monocytes (Ficoll versus Lysed or Percoll)	REACTOME_PYRIMIDINE_CATABOLISM	0.049277	0.762296	0.334046	0.824544
Monocytes (Ficoll versus Lysed or Percoll)	KEGG_SMALL_CELL_LUNG_CANCER	0.0499036	0.167979	0.336523	0.354692
Monocytes (Ficoll versus Lysed or Percoll)	KEGG_NON_HOMOLOGOUS_END_JOINING	0.052789	0.0311251	0.337278	0.285691
Monocytes (Ficoll versus Lysed or Percoll)	REACTOME_SULFUR_AMINO_ACID_METABOLISM	0.0518152	0.0314808	0.337278	0.285691
Monocytes (Ficoll versus Lysed or Percoll)	REACTOME_ABACAVIR_TRANSPORT_AND_METABOLISM	0.0549503	0.0426756	0.337278	0.286673
Monocytes (Ficoll versus Lysed or Percoll)	BIOCARTA_PTDINS_PATHWAY	0.0567294	0.0294172	0.339889	0.285691
Monocytes (Ficoll versus Lysed or Percoll)	REACTOME_TRYPTOPHAN_CATABOLISM	0.0561842	0.0137636	0.339889	0.245601
Monocytes (Ficoll versus Lysed or Percoll)	KEGG_GLYCOSPHINGOLIPID_BIOSYNTHESIS_GANGLIO_SERIES	0.0604365	0.0300048	0.341707	0.285691
Monocytes (Ficoll versus Lysed or Percoll)	KEGG_SULFUR_METABOLISM	0.0601513	0.00999557	0.341707	0.245601
Monocytes (Ficoll versus Lysed or Percoll)	REACTOME_DEVELOPMENTAL_BIOLOGY	0.0604103	0.0139198	0.341707	0.245601
Monocytes (Ficoll versus Lysed or Percoll)	REACTOME_RNA_POL_III_TRANSCRIPTION_INITIATION_FROM_TYPE_3_PROMOTER	0.0594704	0.00619185	0.341707	0.245601
Monocytes (Ficoll versus Lysed or Percoll)	KEGG_CARDIAC_MUSCLE_CONTRACTION	0.0623317	0.0314554	0.344563	0.285691
Monocytes (Ficoll versus Lysed or Percoll)	REACTOME_CHEMOKINE_RECEPTORS_BIND_CHEMOKINES	0.0643933	0.0435952	0.349518	0.286673
Monocytes (Ficoll versus Lysed or Percoll)	KEGG_GLYCOSAMINOGLYCAN_BIOSYNTHESIS_CHONDROITIN_SULFATE	0.066003	0.0154152	0.34954	0.245601
Monocytes (Ficoll versus Lysed or Percoll)	REACTOME_INTEGRATION_OF_ENERGY_METABOLISM	0.0681855	0.0147266	0.34954	0.245601
Monocytes (Ficoll versus Lysed or Percoll)	REACTOME_MITOCHONDRIAL_TRNA_AMINOACYLATION	0.0674146	0.0341002	0.34954	0.285976
Monocytes (Ficoll versus Lysed or Percoll)	REACTOME_NEGATIVE_REGULATION_OF_FGFR_SIGNALING	0.0693832	0.0472386	0.351148	0.286673
Monocytes (Ficoll versus Lysed or Percoll)	NABA_ECM_REGULATORS	0.0735184	0.0423395	0.358681	0.286673
Monocytes (Ficoll versus Lysed or Percoll)	REACTOME_NUCLEOTIDE_EXCISION_REPAIR	0.0794473	0.00045525	0.369416	0.206594
Monocytes (Ficoll versus Lysed or Percoll)	REACTOME_NCAM_SIGNALING_FOR_NEURITE_OUT_GROWTH	0.0792548	0.00148092	0.369416	0.206594
Monocytes (Ficoll versus Lysed or Percoll)	REACTOME_IONOTROPIC_ACTIVITY_OF_KAINATE_RECEPTORS	0.0785225	0.0473266	0.369416	0.286673
Monocytes (Ficoll versus Lysed or Percoll)	REACTOME_SHC_MEDIATED_CASCADE	0.0777912	0.0308797	0.369416	0.285691
Monocytes (Ficoll versus Lysed or Percoll)	REACTOME_AXON_GUIDANCE	0.0819475	0.0149205	0.375792	0.245601
Monocytes (Ficoll versus Lysed or Percoll)	REACTOME_ABCA_TRANSPORTERS_IN_LIPID_HOMEOSTASIS	0.084615	0.0290262	0.378275	0.285691
Monocytes (Ficoll versus Lysed or Percoll)	KEGG_OLFACTORY_TRANSDUCTION	0.0854996	0.0198912	0.378431	0.250216
Monocytes (Ficoll versus Lysed or Percoll)	REACTOME_NETRIN1_SIGNALING	0.0873237	0.0180663	0.383867	0.250216
Monocytes (Ficoll versus Lysed or Percoll)	PID_HDAC_CLASSIII_PATHWAY	0.0880854	0.0116332	0.385898	0.245601
Monocytes (Ficoll versus Lysed or Percoll)	REACTOME_PLATELET_CALCIUM_HOMEOSTASIS	0.0911546	0.0119064	0.387951	0.245601
Monocytes (Ficoll versus Lysed or Percoll)	REACTOME_RNA_POL_II_TRANSCRIPTION_PRE_INITIATION_AND_PROMOTER_OPENING	0.0926596	0.0400065	0.38847	0.286673
Monocytes (Ficoll versus Lysed or Percoll)	REACTOME_L1CAM_INTERACTIONS	0.0941395	0.0111618	0.38847	0.245601
Monocytes (Ficoll versus Lysed or Percoll)	REACTOME_ANTIVIRAL_MECHANISM_BY_IFN_STIMULATED_GENES	0.0968094	0.0119527	0.389658	0.245601
Monocytes (Ficoll versus Lysed or Percoll)	REACTOME_OLFACTORY_SIGNALING_PATHWAY	0.101058	0.0167755	0.390653	0.245601
Monocytes (Ficoll versus Lysed or Percoll)	REACTOME_TRANSCRIPTION_COUPLED_NER_TC_NER	0.098669	0.00355809	0.390653	0.245601
Monocytes (Ficoll versus Lysed or Percoll)	REACTOME_MTORC1_MEDIATED_SIGNALLING	0.107083	0.0244574	0.399778	0.28126
Monocytes (Ficoll versus Lysed or Percoll)	KEGG_NUCLEOTIDE_EXCISION_REPAIR	0.109241	0.0122735	0.403215	0.245601
Monocytes (Ficoll versus Lysed or Percoll)	BIOCARTA_PARKIN_PATHWAY	0.112208	0.0372414	0.406361	0.285976
Monocytes (Ficoll versus Lysed or Percoll)	REACTOME_RNA_POL_II_PRE_TRANSCRIPTION_EVENTS	0.117987	0.0379673	0.415209	0.285976
Monocytes (Ficoll versus Lysed or Percoll)	KEGG_RNA_POLYMERASE	0.120812	0.00486534	0.415242	0.245601
Monocytes (Ficoll versus Lysed or Percoll)	BIOCARTA_CCR5_PATHWAY	0.120998	0.00697085	0.415242	0.245601
Monocytes (Ficoll versus Lysed or Percoll)	BIOCARTA_CARM1_PATHWAY	0.120569	0.0122446	0.415242	0.245601
Monocytes (Ficoll versus Lysed or Percoll)	REACTOME_NA_CL_DEPENDENT_NEUROTRANSMITTER_TRANSPORTERS	0.12092	0.0111505	0.415242	0.245601
Monocytes (Ficoll versus Lysed or Percoll)	REACTOME_BRANCHED_CHAIN_AMINO_ACID_CATABOLISM	0.122583	0.03442	0.415492	0.285976
Monocytes (Ficoll versus Lysed or Percoll)	REACTOME_CHOLESTEROL_BIOSYNTHESIS	0.122549	0.0472303	0.415492	0.286673
Monocytes (Ficoll versus Lysed or Percoll)	NABA_ECM_AFFILIATED	0.128636	0.049563	0.431468	0.286673
Monocytes (Ficoll versus Lysed or Percoll)	REACTOME_G_BETA_GAMMA_SIGNALLING_THROUGH_PLC_BETA	0.129282	0.0439846	0.432507	0.286673
Monocytes (Ficoll versus Lysed or Percoll)	KEGG_PYRIMIDINE_METABOLISM	0.134688	0.0115231	0.43727	0.245601
Monocytes (Ficoll versus Lysed or Percoll)	KEGG_METABOLISM_OF_XENOBIOTICS_BY_CYTOCHROME_P450	0.134783	0.00634206	0.43727	0.245601
Monocytes (Ficoll versus Lysed or Percoll)	PID_SYNDECAN_1_PATHWAY	0.134689	0.013824	0.43727	0.245601
Monocytes (Ficoll versus Lysed or Percoll)	PID_ECADHERIN_STABILIZATION_PATHWAY	0.131254	0.0340377	0.43727	0.285976
Monocytes (Ficoll versus Lysed or Percoll)	REACTOME_RNA_POL_III_TRANSCRIPTION_INITIATION_FROM_TYPE_2_PROMOTER	0.133102	0.0487528	0.43727	0.286673
Monocytes (Ficoll versus Lysed or Percoll)	REACTOME_DOWNREGULATION_OF_ERBB2_ERBB3_SIGNALING	0.138621	0.0405528	0.439763	0.286673
Monocytes (Ficoll versus Lysed or Percoll)	KEGG_NOD_LIKE_RECEPTOR_SIGNALING_PATHWAY	0.139744	0.0351766	0.441154	0.285976
Monocytes (Ficoll versus Lysed or Percoll)	REACTOME_IMMUNOREGULATORY_INTERACTIONS_BETWEEN_A_LYMPHOID_AND_A_NON_LYMPHOID_CELL	0.140719	0.0136372	0.443145	0.245601
Monocytes (Ficoll versus Lysed or Percoll)	REACTOME_ACYL_CHAIN_REMODELLING_OF_PC	0.146468	0.0157553	0.445394	0.245601
Monocytes (Ficoll versus Lysed or Percoll)	BIOCARTA_RB_PATHWAY	0.152991	0.0352708	0.456139	0.285976
Monocytes (Ficoll versus Lysed or Percoll)	KEGG_CHEMOKINE_SIGNALING_PATHWAY	0.15662	0.0293426	0.457738	0.285691
Monocytes (Ficoll versus Lysed or Percoll)	REACTOME_FGFR1_LIGAND_BINDING_AND_ACTIVATION	0.156105	0.0474832	0.457738	0.286673
Monocytes (Ficoll versus Lysed or Percoll)	NABA_PROTEOGLYCANS	0.156293	0.0341675	0.457738	0.285976
Monocytes (Ficoll versus Lysed or Percoll)	REACTOME_MICRORNA_MIRNA_BIOGENESIS	0.163529	0.00160399	0.457947	0.206594
Monocytes (Ficoll versus Lysed or Percoll)	REACTOME_MUSCLE_CONTRACTION	0.161729	0.0471906	0.457947	0.286673
Monocytes (Ficoll versus Lysed or Percoll)	REACTOME_RNA_POL_III_TRANSCRIPTION_TERMINATION	0.159689	0.0256759	0.457947	0.285691
Monocytes (Ficoll versus Lysed or Percoll)	REACTOME_RNA_POL_III_CHAIN_ELONGATION	0.163908	0.0287027	0.457947	0.285691
Monocytes (Ficoll versus Lysed or Percoll)	REACTOME_REGULATORY_RNA_PATHWAYS	0.1705	0.0166663	0.466345	0.245601
Monocytes (Ficoll versus Lysed or Percoll)	REACTOME_CLASS_A1_RHODOPSIN_LIKE_RECEPTORS	0.175401	0.0259867	0.469682	0.285691
Monocytes (Ficoll versus Lysed or Percoll)	REACTOME_FGFR4_LIGAND_BINDING_AND_ACTIVATION	0.178619	0.0484415	0.472406	0.286673
Monocytes (Ficoll versus Lysed or Percoll)	REACTOME_FORMATION_OF_THE_HIV1_EARLY_ELONGATION_COMPLEX	0.17973	0.0115479	0.473808	0.245601
Monocytes (Ficoll versus Lysed or Percoll)	REACTOME_LATE_PHASE_OF_HIV_LIFE_CYCLE	0.182618	0.0167487	0.475176	0.245601
Monocytes (Ficoll versus Lysed or Percoll)	REACTOME_HIV_LIFE_CYCLE	0.183581	0.0149203	0.476719	0.245601
Monocytes (Ficoll versus Lysed or Percoll)	KEGG_STEROID_BIOSYNTHESIS	0.184436	0.030162	0.477974	0.285691
Monocytes (Ficoll versus Lysed or Percoll)	REACTOME_GLYCOSPHINGOLIPID_METABOLISM	0.199677	0.0374728	0.488014	0.285976
Monocytes (Ficoll versus Lysed or Percoll)	REACTOME_EXTRACELLULAR_MATRIX_ORGANIZATION	0.197631	0.0306026	0.488014	0.285691
Monocytes (Ficoll versus Lysed or Percoll)	REACTOME_EICOSANOID_LIGAND_BINDING_RECEPTORS	0.19849	0.0361152	0.488014	0.285976
Monocytes (Ficoll versus Lysed or Percoll)	REACTOME_FORMATION_OF_RNA_POL_II_ELONGATION_COMPLEX_	0.198012	0.0181197	0.488014	0.250216
Monocytes (Ficoll versus Lysed or Percoll)	REACTOME_FORMATION_OF_TRANSCRIPTION_COUPLED_NER_TC_NER_REPAIR_COMPLEX	0.198801	0.00468344	0.488014	0.245601
Monocytes (Ficoll versus Lysed or Percoll)	REACTOME_EARLY_PHASE_OF_HIV_LIFE_CYCLE	0.201781	0.0327096	0.488743	0.285976
Monocytes (Ficoll versus Lysed or Percoll)	REACTOME_DNA_REPLICATION	0.20541	0.0341306	0.489619	0.285976
Monocytes (Ficoll versus Lysed or Percoll)	REACTOME_SIGNALING_BY_BMP	0.207789	0.0158374	0.493787	0.245601
Monocytes (Ficoll versus Lysed or Percoll)	BIOCARTA_TCRA_PATHWAY	0.209262	0.0254104	0.496371	0.285691
Monocytes (Ficoll versus Lysed or Percoll)	BIOCARTA_STATHMIN_PATHWAY	0.214637	0.0102244	0.502641	0.245601
Monocytes (Ficoll versus Lysed or Percoll)	PID_IL3_PATHWAY	0.215462	0.020113	0.503122	0.250216
Monocytes (Ficoll versus Lysed or Percoll)	REACTOME_DESTABILIZATION_OF_MRNA_BY_TRISTETRAPROLIN_TTP	0.215624	0.006877	0.503122	0.245601
Monocytes (Ficoll versus Lysed or Percoll)	PID_IL6_7_PATHWAY	0.218477	0.036456	0.507335	0.285976
Monocytes (Ficoll versus Lysed or Percoll)	REACTOME_ACTIVATION_OF_THE_AP1_FAMILY_OF_TRANSCRIPTION_FACTORS	0.219967	0.00369512	0.507335	0.245601
Monocytes (Ficoll versus Lysed or Percoll)	REACTOME_INTERACTION_BETWEEN_L1_AND_ANKYRINS	0.219776	0.0350158	0.507335	0.285976
Monocytes (Ficoll versus Lysed or Percoll)	REACTOME_PURINE_METABOLISM	0.22058	0.0421127	0.507335	0.286673
Monocytes (Ficoll versus Lysed or Percoll)	REACTOME_BILE_SALT_AND_ORGANIC_ANION_SLC_TRANSPORTERS	0.223217	0.034182	0.511571	0.285976
Monocytes (Ficoll versus Lysed or Percoll)	REACTOME_METABOLISM_OF_RNA	0.230863	0.0412928	0.513692	0.286673
Monocytes (Ficoll versus Lysed or Percoll)	REACTOME_METABOLISM_OF_LIPIDS_AND_LIPOPROTEINS	0.234203	0.0118492	0.513692	0.245601
Monocytes (Ficoll versus Lysed or Percoll)	REACTOME_INFLAMMASOMES	0.233576	0.0211206	0.513692	0.254236
Monocytes (Ficoll versus Lysed or Percoll)	REACTOME_ABORTIVE_ELONGATION_OF_HIV1_TRANSCRIPT_IN_THE_ABSENCE_OF_TAT	0.237869	0.00677166	0.51672	0.245601
Monocytes (Ficoll versus Lysed or Percoll)	REACTOME_DOWNSTREAM_TCR_SIGNALING	0.241641	0.0200946	0.520458	0.250216
Monocytes (Ficoll versus Lysed or Percoll)	REACTOME_MRNA_DECAY_BY_3_TO_5_EXORIBONUCLEASE	0.242774	0.0464479	0.522025	0.286673
Monocytes (Ficoll versus Lysed or Percoll)	REACTOME_THROMBOXANE_SIGNALLING_THROUGH_TP_RECEPTOR	0.245651	0.00785043	0.525871	0.245601
Monocytes (Ficoll versus Lysed or Percoll)	KEGG_CYSTEINE_AND_METHIONINE_METABOLISM	0.249297	0.0239089	0.526236	0.28126
Monocytes (Ficoll versus Lysed or Percoll)	BIOCARTA_WNT_PATHWAY	0.249308	0.00794918	0.526236	0.245601
Monocytes (Ficoll versus Lysed or Percoll)	PID_DNA_PK_PATHWAY	0.251913	0.0489637	0.526236	0.286673
Monocytes (Ficoll versus Lysed or Percoll)	PID_SMAD2_3PATHWAY	0.247884	0.0200351	0.526236	0.250216
Monocytes (Ficoll versus Lysed or Percoll)	REACTOME_MITOCHONDRIAL_PROTEIN_IMPORT	0.252904	0.0459017	0.526236	0.286673
Monocytes (Ficoll versus Lysed or Percoll)	REACTOME_ELONGATION_ARREST_AND_RECOVERY	0.247757	0.00869684	0.526236	0.245601
Monocytes (Ficoll versus Lysed or Percoll)	REACTOME_LYSOSOME_VESICLE_BIOGENESIS	0.252013	0.046962	0.526236	0.286673
Monocytes (Ficoll versus Lysed or Percoll)	REACTOME_VIRAL_MESSENGER_RNA_SYNTHESIS	0.252005	0.00246146	0.526236	0.245601
Monocytes (Ficoll versus Lysed or Percoll)	KEGG_TGF_BETA_SIGNALING_PATHWAY	0.264255	0.0269421	0.530156	0.285691
Monocytes (Ficoll versus Lysed or Percoll)	REACTOME_GLYCOSAMINOGLYCAN_METABOLISM	0.260561	0.0463526	0.530156	0.286673
Monocytes (Ficoll versus Lysed or Percoll)	REACTOME_SLC_MEDIATED_TRANSMEMBRANE_TRANSPORT	0.262829	0.0487634	0.530156	0.286673
Monocytes (Ficoll versus Lysed or Percoll)	REACTOME_FATTY_ACID_TRIACYLGLYCEROL_AND_KETONE_BODY_METABOLISM	0.261349	0.00750896	0.530156	0.245601
Monocytes (Ficoll versus Lysed or Percoll)	BIOCARTA_ARENRF2_PATHWAY	0.269419	0.000877014	0.532361	0.206594
Monocytes (Ficoll versus Lysed or Percoll)	PID_NOTCH_PATHWAY	0.270959	0.0130299	0.532361	0.245601
Monocytes (Ficoll versus Lysed or Percoll)	PID_P53_REGULATION_PATHWAY	0.272102	0.037881	0.532361	0.285976
Monocytes (Ficoll versus Lysed or Percoll)	REACTOME_HIV_INFECTION	0.267852	0.0298282	0.532361	0.285691
Monocytes (Ficoll versus Lysed or Percoll)	KEGG_RENIN_ANGIOTENSIN_SYSTEM	0.27334	0.0483668	0.533427	0.286673
Monocytes (Ficoll versus Lysed or Percoll)	REACTOME_ADP_SIGNALLING_THROUGH_P2RY1	0.275108	0.0306726	0.53496	0.285691
Monocytes (Ficoll versus Lysed or Percoll)	BIOCARTA_ALK_PATHWAY	0.289694	0.0322733	0.551962	0.285976
Monocytes (Ficoll versus Lysed or Percoll)	REACTOME_METABOLISM_OF_POLYAMINES	0.288051	0.016944	0.551962	0.245601
Monocytes (Ficoll versus Lysed or Percoll)	PID_ERBB1_DOWNSTREAM_PATHWAY	0.295784	0.048605	0.56025	0.286673
Monocytes (Ficoll versus Lysed or Percoll)	REACTOME_SYNTHESIS_OF_BILE_ACIDS_AND_BILE_SALTS_VIA_24_HYDROXYCHOLESTEROL	0.297372	0.03946	0.560432	0.286673
Monocytes (Ficoll versus Lysed or Percoll)	REACTOME_MRNA_DECAY_BY_5_TO_3_EXORIBONUCLEASE	0.309895	0.0243677	0.572144	0.28126
Monocytes (Ficoll versus Lysed or Percoll)	REACTOME_TRANSPORT_TO_THE_GOLGI_AND_SUBSEQUENT_MODIFICATION	0.309742	0.0137377	0.572144	0.245601
Monocytes (Ficoll versus Lysed or Percoll)	REACTOME_THROMBIN_SIGNALLING_THROUGH_PROTEINASE_ACTIVATED_RECEPTORS_PARS	0.31895	0.0308368	0.577789	0.285691
Monocytes (Ficoll versus Lysed or Percoll)	PID_INSULIN_PATHWAY	0.335705	0.0201496	0.591513	0.250216
Monocytes (Ficoll versus Lysed or Percoll)	BIOCARTA_SHH_PATHWAY	0.338822	0.0187151	0.593745	0.250216
Monocytes (Ficoll versus Lysed or Percoll)	REACTOME_MRNA_CAPPING	0.343963	0.0045353	0.597874	0.245601
Monocytes (Ficoll versus Lysed or Percoll)	REACTOME_INFLUENZA_LIFE_CYCLE	0.355834	0.0171949	0.607038	0.246078
Monocytes (Ficoll versus Lysed or Percoll)	REACTOME_UNFOLDED_PROTEIN_RESPONSE	0.363568	0.042996	0.613729	0.286673
Monocytes (Ficoll versus Lysed or Percoll)	REACTOME_PURINE_SALVAGE	0.365609	0.0365506	0.615562	0.285976
Monocytes (Ficoll versus Lysed or Percoll)	REACTOME_SPHINGOLIPID_METABOLISM	0.373685	0.0278509	0.619108	0.285691
Monocytes (Ficoll versus Lysed or Percoll)	PID_IL8_CXCR1_PATHWAY	0.377019	0.0387208	0.619514	0.286623
Monocytes (Ficoll versus Lysed or Percoll)	REACTOME_DESTABILIZATION_OF_MRNA_BY_BRF1	0.376256	0.0242482	0.619514	0.28126
Monocytes (Ficoll versus Lysed or Percoll)	REACTOME_THE_NLRP3_INFLAMMASOME	0.394346	0.0291933	0.632524	0.285691
Monocytes (Ficoll versus Lysed or Percoll)	REACTOME_G_ALPHA_I_SIGNALLING_EVENTS	0.410442	0.0129224	0.643909	0.245601
Monocytes (Ficoll versus Lysed or Percoll)	REACTOME_INFLUENZA_VIRAL_RNA_TRANSCRIPTION_AND_REPLICATION	0.413714	0.0142149	0.645307	0.245601
Monocytes (Ficoll versus Lysed or Percoll)	REACTOME_HYALURONAN_METABOLISM	0.415187	0.0391622	0.645391	0.286673
Monocytes (Ficoll versus Lysed or Percoll)	PID_MYC_REPRESS_PATHWAY	0.424083	0.0118841	0.649833	0.245601
Monocytes (Ficoll versus Lysed or Percoll)	ST_GRANULE_CELL_SURVIVAL_PATHWAY	0.436224	0.0495488	0.658262	0.286673
Monocytes (Ficoll versus Lysed or Percoll)	REACTOME_TRANSCRIPTIONAL_ACTIVITY_OF_SMAD2_SMAD3_SMAD4_HETEROTRIMER	0.441311	0.0304206	0.660172	0.285691
Monocytes (Ficoll versus Lysed or Percoll)	REACTOME_AMINE_COMPOUND_SLC_TRANSPORTERS	0.444011	0.0059722	0.66137	0.245601
Monocytes (Ficoll versus Lysed or Percoll)	REACTOME_REGULATION_OF_SIGNALING_BY_CBL	0.445193	0.0471663	0.66137	0.286673
Monocytes (Ficoll versus Lysed or Percoll)	REACTOME_SMAD2_SMAD3_SMAD4_HETEROTRIMER_REGULATES_TRANSCRIPTION	0.46084	0.0469203	0.670692	0.286673
Monocytes (Ficoll versus Lysed or Percoll)	PID_MET_PATHWAY	0.463159	0.021031	0.672546	0.254236
Monocytes (Ficoll versus Lysed or Percoll)	ST_P38_MAPK_PATHWAY	0.473226	0.0111973	0.67703	0.245601
Monocytes (Ficoll versus Lysed or Percoll)	REACTOME_PI3K_AKT_ACTIVATION	0.474296	0.000528398	0.677266	0.206594
Monocytes (Ficoll versus Lysed or Percoll)	BIOCARTA_PAR1_PATHWAY	0.479877	0.0373638	0.679377	0.285976
Monocytes (Ficoll versus Lysed or Percoll)	PID_LIS1_PATHWAY	0.486791	0.0469978	0.679377	0.286673
Monocytes (Ficoll versus Lysed or Percoll)	PID_PDGFRA_PATHWAY	0.482768	0.030979	0.679377	0.285691
Monocytes (Ficoll versus Lysed or Percoll)	REACTOME_SYNTHESIS_OF_PC	0.487231	0.00549234	0.679377	0.245601
Monocytes (Ficoll versus Lysed or Percoll)	REACTOME_NOREPINEPHRINE_NEUROTRANSMITTER_RELEASE_CYCLE	0.488959	0.00549405	0.679377	0.245601
Monocytes (Ficoll versus Lysed or Percoll)	KEGG_NOTCH_SIGNALING_PATHWAY	0.495783	0.0163305	0.681332	0.245601
Monocytes (Ficoll versus Lysed or Percoll)	PID_ALK2_PATHWAY	0.506893	0.03717	0.690146	0.285976
Monocytes (Ficoll versus Lysed or Percoll)	REACTOME_TRANSPORT_OF_GLUCOSE_AND_OTHER_SUGARS_BILE_SALTS_AND_ORGANIC_ACIDS_METAL_IONS_AND_AMINE_COMPOUNDS	0.512946	0.00102142	0.692075	0.206594
Monocytes (Ficoll versus Lysed or Percoll)	KEGG_ENDOCYTOSIS	0.515861	0.00402598	0.694283	0.245601
Monocytes (Ficoll versus Lysed or Percoll)	REACTOME_DIABETES_PATHWAYS	0.519609	0.0353823	0.697869	0.285976
Monocytes (Ficoll versus Lysed or Percoll)	REACTOME_ANTIGEN_PRESENTATION_FOLDING_ASSEMBLY_AND_PEPTIDE_LOADING_OF_CLASS_I_MHC	0.520743	0.0420888	0.698663	0.286673
Monocytes (Ficoll versus Lysed or Percoll)	REACTOME_PPARA_ACTIVATES_GENE_EXPRESSION	0.528349	0.00975561	0.705927	0.245601
Monocytes (Ficoll versus Lysed or Percoll)	SA_MMP_CYTOKINE_CONNECTION	0.532549	0.0297677	0.709946	0.285691
Monocytes (Ficoll versus Lysed or Percoll)	REACTOME_CHONDROITIN_SULFATE_DERMATAN_SULFATE_METABOLISM	0.560917	0.0120839	0.727554	0.245601
Monocytes (Ficoll versus Lysed or Percoll)	BIOCARTA_EPHA4_PATHWAY	0.573567	0.0166055	0.738016	0.245601
Monocytes (Ficoll versus Lysed or Percoll)	REACTOME_SPHINGOLIPID_DE_NOVO_BIOSYNTHESIS	0.595361	0.0138129	0.75207	0.245601
Monocytes (Ficoll versus Lysed or Percoll)	BIOCARTA_GCR_PATHWAY	0.604126	0.0284894	0.756468	0.285691
Monocytes (Ficoll versus Lysed or Percoll)	REACTOME_PERK_REGULATED_GENE_EXPRESSION	0.604939	0.0290211	0.756468	0.285691
Monocytes (Ficoll versus Lysed or Percoll)	REACTOME_ACTIVATION_OF_GENES_BY_ATF4	0.604425	0.0186212	0.756468	0.250216
Monocytes (Ficoll versus Lysed or Percoll)	BIOCARTA_TID_PATHWAY	0.607794	0.00536535	0.757983	0.245601
Monocytes (Ficoll versus Lysed or Percoll)	REACTOME_SIGNALING_BY_NOTCH	0.612597	0.0442203	0.757983	0.286673
Monocytes (Ficoll versus Lysed or Percoll)	BIOCARTA_PLCE_PATHWAY	0.617301	0.0324133	0.759393	0.285976
Monocytes (Ficoll versus Lysed or Percoll)	PID_P38_MK2_PATHWAY	0.642918	0.00141554	0.778269	0.206594
Monocytes (Ficoll versus Lysed or Percoll)	PID_IL8_CXCR2_PATHWAY	0.646128	0.0275893	0.780105	0.285691
Monocytes (Ficoll versus Lysed or Percoll)	BIOCARTA_IL6_PATHWAY	0.668453	0.0207888	0.796454	0.254236
Monocytes (Ficoll versus Lysed or Percoll)	REACTOME_NOTCH_HLH_TRANSCRIPTION_PATHWAY	0.6838	0.0447668	0.810989	0.286673
Monocytes (Ficoll versus Lysed or Percoll)	REACTOME_INSULIN_SYNTHESIS_AND_PROCESSING	0.7036	0.014465	0.824101	0.245601
Monocytes (Ficoll versus Lysed or Percoll)	REACTOME_NUCLEOTIDE_BINDING_DOMAIN_LEUCINE_RICH_REPEAT_CONTAINING_RECEPTOR_NLR_SIGNALING_PATHWAYS	0.700314	0.0439191	0.824101	0.286673
Monocytes (Ficoll versus Lysed or Percoll)	KEGG_GLYCOSPHINGOLIPID_BIOSYNTHESIS_GLOBO_SERIES	0.71986	0.0470702	0.837241	0.286673
Monocytes (Ficoll versus Lysed or Percoll)	PID_PLK1_PATHWAY	0.72135	0.00125493	0.837241	0.206594
Monocytes (Ficoll versus Lysed or Percoll)	REACTOME_BILE_ACID_AND_BILE_SALT_METABOLISM	0.742338	0.00639489	0.85172	0.245601
Monocytes (Ficoll versus Lysed or Percoll)	BIOCARTA_AKAP13_PATHWAY	0.75425	0.0368223	0.858374	0.285976
Monocytes (Ficoll versus Lysed or Percoll)	PID_AR_PATHWAY	0.781223	0.0489779	0.874779	0.286673
Monocytes (Ficoll versus Lysed or Percoll)	BIOCARTA_MTOR_PATHWAY	0.799422	0.018731	0.885035	0.250216
Monocytes (Ficoll versus Lysed or Percoll)	REACTOME_SEMA4D_IN_SEMAPHORIN_SIGNALING	0.799278	0.0498168	0.885035	0.286673
Monocytes (Ficoll versus Lysed or Percoll)	KEGG_CYTOSOLIC_DNA_SENSING_PATHWAY	0.80457	0.0269724	0.887644	0.285691
Monocytes (Ficoll versus Lysed or Percoll)	REACTOME_CHONDROITIN_SULFATE_BIOSYNTHESIS	0.828571	0.00491189	0.902113	0.245601
Monocytes (Ficoll versus Lysed or Percoll)	REACTOME_SIGNALING_BY_NOTCH1	0.835818	0.0423402	0.907362	0.286673
Monocytes (Ficoll versus Lysed or Percoll)	BIOCARTA_INSULIN_PATHWAY	0.860826	0.0334578	0.919969	0.285976
Monocytes (Ficoll versus Lysed or Percoll)	BIOCARTA_IGF1_PATHWAY	0.874085	0.0370811	0.926148	0.285976
Monocytes (Ficoll versus Lysed or Percoll)	PID_EPHRINB_REV_PATHWAY	0.887454	0.000667085	0.935385	0.206594
Monocytes (Ficoll versus Lysed or Percoll)	REACTOME_SEMA4D_INDUCED_CELL_MIGRATION_AND_GROWTH_CONE_COLLAPSE	0.89165	0.0105013	0.938168	0.245601
Monocytes (Ficoll versus Lysed or Percoll)	KEGG_ANTIGEN_PROCESSING_AND_PRESENTATION	0.923045	0.0236685	0.955693	0.28126
Monocytes (Ficoll versus Lysed or Percoll)	BIOCARTA_P27_PATHWAY	0.934246	0.047521	0.961877	0.286673
Monocytes (Ficoll versus Lysed or Percoll)	PID_P53_DOWNSTREAM_PATHWAY	0.945219	0.00370868	0.971622	0.245601
Monocytes (Ficoll versus Lysed or Percoll)	PID_NCADHERIN_PATHWAY	0.957365	0.0200899	0.979516	0.250216
Comparison	Gene Set	Ficoll versus Collagenase+Percoll (P value)	Ficoll versusWhole Blood Lysis (P value)	Ficoll versus Collagenase+Percoll (FDR)	Ficoll versusWhole Blood Lysis (FDR)
CD8 Tcells (Ficoll versus Lysed or Percoll)	KEGG_PROTEIN_EXPORT	0.800443	0.00363187	0.959997	0.916544
CD8 Tcells (Ficoll versus Lysed or Percoll)	KEGG_HOMOLOGOUS_RECOMBINATION	0.66675	0.0282167	0.921421	0.916544
CD8 Tcells (Ficoll versus Lysed or Percoll)	KEGG_CALCIUM_SIGNALING_PATHWAY	0.120924	0.0278448	0.672815	0.916544
CD8 Tcells (Ficoll versus Lysed or Percoll)	KEGG_TOLL_LIKE_RECEPTOR_SIGNALING_PATHWAY	0.0758157	0.0342321	0.672815	0.916544
CD8 Tcells (Ficoll versus Lysed or Percoll)	BIOCARTA_AT1R_PATHWAY	0.199402	0.0126644	0.732962	0.916544
CD8 Tcells (Ficoll versus Lysed or Percoll)	BIOCARTA_HDAC_PATHWAY	0.0621338	0.0314403	0.672815	0.916544
CD8 Tcells (Ficoll versus Lysed or Percoll)	BIOCARTA_AHSP_PATHWAY	0.779052	0.000155941	0.959525	0.193523
CD8 Tcells (Ficoll versus Lysed or Percoll)	ST_P38_MAPK_PATHWAY	0.433435	0.0467139	0.837839	0.916544
CD8 Tcells (Ficoll versus Lysed or Percoll)	PID_S1P_S1P1_PATHWAY	0.0785371	0.0230601	0.672815	0.916544
CD8 Tcells (Ficoll versus Lysed or Percoll)	PID_MYC_PATHWAY	0.869639	0.0343884	0.977396	0.916544
CD8 Tcells (Ficoll versus Lysed or Percoll)	PID_HEDGEHOG_2PATHWAY	0.367689	0.0178553	0.826594	0.916544
CD8 Tcells (Ficoll versus Lysed or Percoll)	REACTOME_ABCA_TRANSPORTERS_IN_LIPID_HOMEOSTASIS	0.244371	0.0433049	0.771666	0.916544
CD8 Tcells (Ficoll versus Lysed or Percoll)	REACTOME_ANTIGEN_ACTIVATES_B_CELL_RECEPTOR_LEADING_TO_GENERATION_OF_SECOND_MESSENGERS	0.19029	0.0203193	0.726799	0.916544
CD8 Tcells (Ficoll versus Lysed or Percoll)	REACTOME_ALPHA_LINOLENIC_ACID_ALA_METABOLISM	0.0541944	0.0319983	0.672815	0.916544
CD8 Tcells (Ficoll versus Lysed or Percoll)	REACTOME_NRIF_SIGNALS_CELL_DEATH_FROM_THE_NUCLEUS	0.0885487	0.0163394	0.672815	0.916544
CD8 Tcells (Ficoll versus Lysed or Percoll)	REACTOME_P75_NTR_RECEPTOR_MEDIATED_SIGNALLING	0.0773297	0.00440805	0.672815	0.916544
CD8 Tcells (Ficoll versus Lysed or Percoll)	REACTOME_COMMON_PATHWAY	0.409258	0.0205836	0.829212	0.916544
CD8 Tcells (Ficoll versus Lysed or Percoll)	REACTOME_ADENYLATE_CYCLASE_ACTIVATING_PATHWAY	0.207162	0.038397	0.732962	0.916544
CD8 Tcells (Ficoll versus Lysed or Percoll)	REACTOME_ABC_FAMILY_PROTEINS_MEDIATED_TRANSPORT	0.309356	0.00842603	0.791791	0.916544
CD8 Tcells (Ficoll versus Lysed or Percoll)	REACTOME_INSULIN_SYNTHESIS_AND_PROCESSING	0.16394	0.00617965	0.707851	0.916544
CD8 Tcells (Ficoll versus Lysed or Percoll)	REACTOME_FACILITATIVE_NA_INDEPENDENT_GLUCOSE_TRANSPORTERS	0.54856	0.0103586	0.88624	0.916544
CD8 Tcells (Ficoll versus Lysed or Percoll)	REACTOME_AMINO_ACID_AND_OLIGOPEPTIDE_SLC_TRANSPORTERS	0.975282	0.00592401	0.996152	0.916544
CD8 Tcells (Ficoll versus Lysed or Percoll)	REACTOME_DOUBLE_STRAND_BREAK_REPAIR	0.195161	0.0347038	0.72907	0.916544
CD8 Tcells (Ficoll versus Lysed or Percoll)	REACTOME_IL_RECEPTOR_SHC_SIGNALING	0.841376	0.0205118	0.968863	0.916544
CD8 Tcells (Ficoll versus Lysed or Percoll)	REACTOME_RIG_I_MDA5_MEDIATED_INDUCTION_OF_IFN_ALPHA_BETA_PATHWAYS	0.716855	0.04329	0.937003	0.916544
CD8 Tcells (Ficoll versus Lysed or Percoll)	REACTOME_INFLUENZA_LIFE_CYCLE	0.0953203	0.0441479	0.672815	0.916544
CD8 Tcells (Ficoll versus Lysed or Percoll)	REACTOME_POTASSIUM_CHANNELS	0.471313	0.0292664	0.860395	0.916544
CD8 Tcells (Ficoll versus Lysed or Percoll)	NABA_ECM_GLYCOPROTEINS	0.0897796	0.048532	0.672815	0.916544
CD8 Tcells (Ficoll versus Lysed or Percoll)	NABA_CORE_MATRISOME	0.123438	0.0452057	0.672815	0.916544
CD8 Tcells (Ficoll versus Lysed or Percoll)	NABA_BASEMENT_MEMBRANES	0.107585	0.0273916	0.672815	0.916544
CD8 Tcells (Ficoll versus Lysed or Percoll)	NABA_MATRISOME	0.261491	0.0497033	0.777605	0.916544
CD8 Tcells (Ficoll versus Lysed or Percoll)	KEGG_AMINO_SUGAR_AND_NUCLEOTIDE_SUGAR_METABOLISM	0.0205313	0.72638	0.626248	0.979271
CD8 Tcells (Ficoll versus Lysed or Percoll)	KEGG_GLYCOSAMINOGLYCAN_DEGRADATION	0.0102243	0.452042	0.594148	0.916544
CD8 Tcells (Ficoll versus Lysed or Percoll)	KEGG_RETINOL_METABOLISM	0.0364709	0.0416138	0.672815	0.916544
CD8 Tcells (Ficoll versus Lysed or Percoll)	KEGG_PORPHYRIN_AND_CHLOROPHYLL_METABOLISM	0.0167648	0.316113	0.603394	0.916544
CD8 Tcells (Ficoll versus Lysed or Percoll)	KEGG_DRUG_METABOLISM_OTHER_ENZYMES	0.0307816	0.224205	0.65149	0.916544
CD8 Tcells (Ficoll versus Lysed or Percoll)	KEGG_ERBB_SIGNALING_PATHWAY	0.0394331	0.788623	0.672815	0.979271
CD8 Tcells (Ficoll versus Lysed or Percoll)	KEGG_P53_SIGNALING_PATHWAY	0.0337599	0.563527	0.672465	0.929969
CD8 Tcells (Ficoll versus Lysed or Percoll)	KEGG_WNT_SIGNALING_PATHWAY	0.0392135	0.0852498	0.672815	0.916544
CD8 Tcells (Ficoll versus Lysed or Percoll)	KEGG_TIGHT_JUNCTION	0.0111161	0.230579	0.594148	0.916544
CD8 Tcells (Ficoll versus Lysed or Percoll)	KEGG_HEMATOPOIETIC_CELL_LINEAGE	0.0150088	0.352152	0.594148	0.916544
CD8 Tcells (Ficoll versus Lysed or Percoll)	KEGG_GNRH_SIGNALING_PATHWAY	0.0276332	0.099556	0.65149	0.916544
CD8 Tcells (Ficoll versus Lysed or Percoll)	KEGG_PATHWAYS_IN_CANCER	0.0436591	0.167556	0.672815	0.916544
CD8 Tcells (Ficoll versus Lysed or Percoll)	KEGG_SMALL_CELL_LUNG_CANCER	0.0170175	0.660469	0.603394	0.974604
CD8 Tcells (Ficoll versus Lysed or Percoll)	KEGG_ARRHYTHMOGENIC_RIGHT_VENTRICULAR_CARDIOMYOPATHY_ARVC	0.0213098	0.602314	0.626248	0.946263
CD8 Tcells (Ficoll versus Lysed or Percoll)	BIOCARTA_BCELLSURVIVAL_PATHWAY	0.047682	0.112271	0.672815	0.916544
CD8 Tcells (Ficoll versus Lysed or Percoll)	BIOCARTA_RNA_PATHWAY	0.00734234	0.339733	0.594148	0.916544
CD8 Tcells (Ficoll versus Lysed or Percoll)	BIOCARTA_EIF_PATHWAY	0.0139752	0.171867	0.594148	0.916544
CD8 Tcells (Ficoll versus Lysed or Percoll)	BIOCARTA_HIF_PATHWAY	0.0157993	0.398449	0.594148	0.916544
CD8 Tcells (Ficoll versus Lysed or Percoll)	BIOCARTA_IL6_PATHWAY	0.0495261	0.275139	0.672815	0.916544
CD8 Tcells (Ficoll versus Lysed or Percoll)	BIOCARTA_DEATH_PATHWAY	0.0373463	0.97007	0.672815	0.992874
CD8 Tcells (Ficoll versus Lysed or Percoll)	BIOCARTA_PTDINS_PATHWAY	0.01558	0.483435	0.594148	0.916544
CD8 Tcells (Ficoll versus Lysed or Percoll)	BIOCARTA_PGC1A_PATHWAY	0.00838322	0.383916	0.594148	0.916544
CD8 Tcells (Ficoll versus Lysed or Percoll)	BIOCARTA_AKAP13_PATHWAY	0.026078	0.964887	0.65149	0.992874
CD8 Tcells (Ficoll versus Lysed or Percoll)	BIOCARTA_CARDIACEGF_PATHWAY	0.042974	0.317091	0.672815	0.916544
CD8 Tcells (Ficoll versus Lysed or Percoll)	BIOCARTA_PTC1_PATHWAY	0.0277992	0.271085	0.65149	0.916544
CD8 Tcells (Ficoll versus Lysed or Percoll)	BIOCARTA_TALL1_PATHWAY	0.0402546	0.355182	0.672815	0.916544
CD8 Tcells (Ficoll versus Lysed or Percoll)	BIOCARTA_TGFB_PATHWAY	0.034138	0.937333	0.672465	0.985637
CD8 Tcells (Ficoll versus Lysed or Percoll)	BIOCARTA_CTLA4_PATHWAY	0.00135312	0.846391	0.594148	0.979271
CD8 Tcells (Ficoll versus Lysed or Percoll)	BIOCARTA_STRESS_PATHWAY	0.0110512	0.0833792	0.594148	0.916544
CD8 Tcells (Ficoll versus Lysed or Percoll)	BIOCARTA_TNFR1_PATHWAY	0.00193781	0.134817	0.594148	0.916544
CD8 Tcells (Ficoll versus Lysed or Percoll)	BIOCARTA_TOLL_PATHWAY	0.00804985	0.0278702	0.594148	0.916544
CD8 Tcells (Ficoll versus Lysed or Percoll)	PID_AURORA_B_PATHWAY	0.0147202	0.42892	0.594148	0.916544
CD8 Tcells (Ficoll versus Lysed or Percoll)	PID_P73PATHWAY	0.0314983	0.97922	0.65149	0.995175
CD8 Tcells (Ficoll versus Lysed or Percoll)	PID_WNT_NONCANONICAL_PATHWAY	0.0492592	0.199541	0.672815	0.916544
CD8 Tcells (Ficoll versus Lysed or Percoll)	PID_CD40_PATHWAY	0.00842384	0.144797	0.594148	0.916544
CD8 Tcells (Ficoll versus Lysed or Percoll)	PID_MYC_ACTIV_PATHWAY	0.0448428	0.60911	0.672815	0.948637
CD8 Tcells (Ficoll versus Lysed or Percoll)	PID_RET_PATHWAY	0.00602392	0.12199	0.594148	0.916544
CD8 Tcells (Ficoll versus Lysed or Percoll)	PID_CD8_TCR_PATHWAY	0.0248871	0.268498	0.65149	0.916544
CD8 Tcells (Ficoll versus Lysed or Percoll)	PID_ANGIOPOIETIN_RECEPTOR_PATHWAY	0.027888	0.808448	0.65149	0.979271
CD8 Tcells (Ficoll versus Lysed or Percoll)	PID_IL1_PATHWAY	0.0466982	0.0497293	0.672815	0.916544
CD8 Tcells (Ficoll versus Lysed or Percoll)	PID_TNF_PATHWAY	0.011043	0.544383	0.594148	0.92526
CD8 Tcells (Ficoll versus Lysed or Percoll)	PID_RANBP2_PATHWAY	0.038317	0.982049	0.672815	0.995277
CD8 Tcells (Ficoll versus Lysed or Percoll)	PID_AR_TF_PATHWAY	0.0222038	0.790144	0.626248	0.979271
CD8 Tcells (Ficoll versus Lysed or Percoll)	PID_RXR_VDR_PATHWAY	0.0401319	0.423119	0.672815	0.916544
CD8 Tcells (Ficoll versus Lysed or Percoll)	PID_EPHA_FWDPATHWAY	0.0473745	0.0768378	0.672815	0.916544
CD8 Tcells (Ficoll versus Lysed or Percoll)	PID_IL6_7_PATHWAY	0.0378334	0.554721	0.672815	0.928733
CD8 Tcells (Ficoll versus Lysed or Percoll)	PID_RETINOIC_ACID_PATHWAY	0.00815868	0.00209485	0.594148	0.916544
CD8 Tcells (Ficoll versus Lysed or Percoll)	PID_DELTA_NP63_PATHWAY	0.0312694	0.516516	0.65149	0.916544
CD8 Tcells (Ficoll versus Lysed or Percoll)	REACTOME_IL_7_SIGNALING	0.00378364	0.763911	0.594148	0.979271
CD8 Tcells (Ficoll versus Lysed or Percoll)	REACTOME_ASSOCIATION_OF_LICENSING_FACTORS_WITH_THE_PRE_REPLICATIVE_COMPLEX	0.0411401	0.0687142	0.672815	0.916544
CD8 Tcells (Ficoll versus Lysed or Percoll)	REACTOME_PRE_NOTCH_TRANSCRIPTION_AND_TRANSLATION	0.0217436	0.208559	0.626248	0.916544
CD8 Tcells (Ficoll versus Lysed or Percoll)	REACTOME_PRE_NOTCH_EXPRESSION_AND_PROCESSING	0.0190879	0.252863	0.611296	0.916544
CD8 Tcells (Ficoll versus Lysed or Percoll)	REACTOME_INSULIN_RECEPTOR_SIGNALLING_CASCADE	0.0368514	0.532735	0.672815	0.91905
CD8 Tcells (Ficoll versus Lysed or Percoll)	REACTOME_DOWNREGULATION_OF_TGF_BETA_RECEPTOR_SIGNALING	0.0264735	0.740562	0.65149	0.979271
CD8 Tcells (Ficoll versus Lysed or Percoll)	REACTOME_COLLAGEN_FORMATION	0.0183133	0.113138	0.611296	0.916544
CD8 Tcells (Ficoll versus Lysed or Percoll)	REACTOME_TGF_BETA_RECEPTOR_SIGNALING_ACTIVATES_SMADS	0.0100922	0.856957	0.594148	0.979271
CD8 Tcells (Ficoll versus Lysed or Percoll)	REACTOME_ACTIVATED_POINT_MUTANTS_OF_FGFR2	0.00493303	0.267861	0.594148	0.916544
CD8 Tcells (Ficoll versus Lysed or Percoll)	REACTOME_TRANSCRIPTIONAL_ACTIVITY_OF_SMAD2_SMAD3_SMAD4_HETEROTRIMER	0.012895	0.428404	0.594148	0.916544
CD8 Tcells (Ficoll versus Lysed or Percoll)	REACTOME_SIGNALING_BY_FGFR_MUTANTS	0.0212576	0.822558	0.626248	0.979271
CD8 Tcells (Ficoll versus Lysed or Percoll)	REACTOME_SHC1_EVENTS_IN_EGFR_SIGNALING	0.0331928	0.348665	0.672465	0.916544
CD8 Tcells (Ficoll versus Lysed or Percoll)	REACTOME_CELL_DEATH_SIGNALLING_VIA_NRAGE_NRIF_AND_NADE	0.0262544	0.0432031	0.65149	0.916544
CD8 Tcells (Ficoll versus Lysed or Percoll)	REACTOME_CELL_CYCLE_MITOTIC	0.0282084	0.150121	0.65149	0.916544
CD8 Tcells (Ficoll versus Lysed or Percoll)	REACTOME_PEROXISOMAL_LIPID_METABOLISM	0.00753405	0.0843461	0.594148	0.916544
CD8 Tcells (Ficoll versus Lysed or Percoll)	REACTOME_MRNA_3_END_PROCESSING	0.0126987	0.453102	0.594148	0.916544
CD8 Tcells (Ficoll versus Lysed or Percoll)	REACTOME_CYCLIN_A_B1_ASSOCIATED_EVENTS_DURING_G2_M_TRANSITION	0.0460193	0.262954	0.672815	0.916544
CD8 Tcells (Ficoll versus Lysed or Percoll)	REACTOME_DEADENYLATION_OF_MRNA	0.0183617	0.130148	0.611296	0.916544
CD8 Tcells (Ficoll versus Lysed or Percoll)	REACTOME_METABOLISM_OF_MRNA	0.00536964	0.00487271	0.594148	0.916544
CD8 Tcells (Ficoll versus Lysed or Percoll)	REACTOME_METABOLISM_OF_RNA	0.01182	0.0203889	0.594148	0.916544
CD8 Tcells (Ficoll versus Lysed or Percoll)	REACTOME_MITOTIC_M_M_G1_PHASES	0.0291752	0.0580573	0.65149	0.916544
CD8 Tcells (Ficoll versus Lysed or Percoll)	REACTOME_AMINO_ACID_SYNTHESIS_AND_INTERCONVERSION_TRANSAMINATION	0.0312302	0.435294	0.65149	0.916544
CD8 Tcells (Ficoll versus Lysed or Percoll)	REACTOME_RAP1_SIGNALLING	0.0236988	0.663269	0.65149	0.977574
CD8 Tcells (Ficoll versus Lysed or Percoll)	REACTOME_IRON_UPTAKE_AND_TRANSPORT	0.0369494	0.13031	0.672815	0.916544
CD8 Tcells (Ficoll versus Lysed or Percoll)	REACTOME_NFKB_AND_MAP_KINASES_ACTIVATION_MEDIATED_BY_TLR4_SIGNALING_REPERTOIRE	0.0289313	0.0718056	0.65149	0.916544
CD8 Tcells (Ficoll versus Lysed or Percoll)	REACTOME_SIGNALING_BY_INSULIN_RECEPTOR	0.0306221	0.918166	0.65149	0.985637
CD8 Tcells (Ficoll versus Lysed or Percoll)	REACTOME_HIV_LIFE_CYCLE	0.00250419	0.524148	0.594148	0.916544
CD8 Tcells (Ficoll versus Lysed or Percoll)	REACTOME_LATE_PHASE_OF_HIV_LIFE_CYCLE	0.0080156	0.595878	0.594148	0.945632
CD8 Tcells (Ficoll versus Lysed or Percoll)	REACTOME_MITOTIC_PROMETAPHASE	0.0147055	0.158889	0.594148	0.916544
CD8 Tcells (Ficoll versus Lysed or Percoll)	REACTOME_SIGNALING_BY_TGF_BETA_RECEPTOR_COMPLEX	0.00802958	0.50784	0.594148	0.916544
CD8 Tcells (Ficoll versus Lysed or Percoll)	REACTOME_ACTIVATED_TLR4_SIGNALLING	0.0117428	0.0633604	0.594148	0.916544
CD8 Tcells (Ficoll versus Lysed or Percoll)	REACTOME_MTORC1_MEDIATED_SIGNALLING	0.0144968	0.739648	0.594148	0.979271
CD8 Tcells (Ficoll versus Lysed or Percoll)	REACTOME_TOLL_RECEPTOR_CASCADES	0.0441505	0.0986776	0.672815	0.916544
CD8 Tcells (Ficoll versus Lysed or Percoll)	REACTOME_NOD1_2_SIGNALING_PATHWAY	0.000303272	0.0610675	0.37636	0.916544
CD8 Tcells (Ficoll versus Lysed or Percoll)	REACTOME_G2_M_CHECKPOINTS	0.0403857	0.170196	0.672815	0.916544
CD8 Tcells (Ficoll versus Lysed or Percoll)	REACTOME_METABOLISM_OF_PORPHYRINS	0.0100392	0.587588	0.594148	0.940899
CD8 Tcells (Ficoll versus Lysed or Percoll)	REACTOME_PI3K_CASCADE	0.0192108	0.770129	0.611296	0.979271
